## 1 **ABSTRACT**

2 Chapparoviruses are a highly divergent group of parvoviruses (family  
3 *Parvoviridae*) first identified in 2013. Interest in these poorly characterized  
4 viruses has been raised by recent studies indicating that they are the cause of  
5 chronic kidney disease that arises spontaneously in laboratory mice. In this  
6 study, we investigate the biological and evolutionary characteristics of  
7 chapparoviruses via comparative analysis of genome sequence data. Our  
8 analysis, which incorporates sequences derived from endogenous viral  
9 elements (EVEs) as well as exogenous viruses, reveals that  
10 chapparoviruses are an ancient lineage within the family *Parvoviridae*,  
11 clustering separately from members of both currently established parvoviral  
12 subfamilies. Consistent with this, they exhibit a number of characteristic  
13 genomic and structural features, i.e. a large number of putative auxiliary  
14 protein-encoding genes, capsid protein genes non-homologous to any hitherto  
15 parvoviral *cap*, as well as a putative capsid structure lacking the canonical fifth  
16 strand of the ABIDG sheet comprising the luminal side of the jelly roll. Our  
17 findings demonstrate that the chapparovirus lineage infects an exceptionally  
18 broad range of host species, including both vertebrates and invertebrates.  
19 Furthermore, we observe that chapparoviruses found in fish are more closely  
20 related to those from invertebrates than they are to those that infect amniote  
21 vertebrates. This suggests that transmission between distantly related host  
22 species may have occurred in the past. Our study provides the first integrated  
23 overview of the chapparovirus group, and revises current views of parvovirus  
24 evolution

25

## 26 **AUTHOR SUMMARY**

27 Chapparoviruses are a recently identified group of viruses about  
28 which relatively little is known. However, recent studies have shown that these  
29 viruses cause disease in laboratory mice and are prevalent in the fecal virome  
30 of pigs and poultry, raising interest in their potential impact as pathogens, and  
31 utility as experimental tools. We examined the genomes of chapparoviruses  
32 and endogenous viral elements ('fossilized' virus sequences derived from  
33 ancestral viruses) using a variety of bioinformatics-based approaches. We

1 show that the chapparvoviruses have an ancient origin and are evolutionarily  
2 distinct from all other related viruses. Accordingly, their genomes and virions  
3 exhibit a range of distinct characteristic features. We examine the distribution  
4 of these features in the light of chapparvovirus evolutionary history (which we  
5 can also infer from genomic data), revealing new insights into chapparvovirus  
6 biology.

7

## 8 INTRODUCTION

9 Parvoviruses (family *Parvoviridae*) are small, non-enveloped viruses  
10 with T=1 icosahedral symmetry and linear, single-stranded DNA (ssDNA)  
11 genomes ~4-6 kilobases (kb) in length. The family has historically been  
12 divided into two subfamilies; *Parvovirinae* and *Densovirinae*, containing  
13 viruses that infect vertebrate and invertebrate hosts, respectively (1). Despite  
14 exhibiting great variation in expression and transcription strategies, they have  
15 a relatively conserved overall genome structure: a non-structural (NS)  
16 expression cassette is located at the left side of the genome, while the  
17 structural viral proteins (VPs) are encoded by the right, and complex, hairpin-  
18 like DNA secondary structures are present at both genomic termini (2). Small  
19 satellite proteins and an assembly-activating protein have been discovered as  
20 products of open reading frames overlapping the right hand expression  
21 cassette (3, 4)

22 Numerous novel parvoviruses have been identified in recent years,  
23 primarily via approaches based on high throughput sequencing (HTS) (5-11).  
24 In addition, progress in whole genome sequencing of eukaryotes has revealed  
25 that sequences derived from parvoviruses occur relatively frequently in animal  
26 genomes (12-17). These endogenous parvoviral elements (EPVs) are derived  
27 from the genomes of ancient parvoviruses that were incorporated into the  
28 gene pool of ancestral host species. This can presumably occur when  
29 infection of a germline cell leads to parvovirus-derived DNA becoming  
30 integrated into host chromosomes, and the cell containing the integrated  
31 sequences then goes on to develop into a viable organism (18). Many EPVs  
32 are millions of years old, and are genetically “fixed” in the genomes of host  
33 species (i.e. all members of the species have the integrated EPV in their

1 genomes). Such ancient EPV sequences are in some ways analogous to  
2 “parvovirus fossils”, since they preserve information about the ancient  
3 parvoviruses that infected ancestral animals.

4       Among the novel parvovirus groups identified via sequencing, one -  
5 provisionally labeled ‘chapparvovirus’ - stands out as being particularly  
6 unusual. These viruses, which have been primarily reported via metagenomic  
7 sequencing of animal feces, derive their name from an acronym (CHAP),  
8 referring to the host groups in which they were first identified (CHiropteran-  
9 Avian-Porcine) (15, 16, 19, 20). Subsequently several additional  
10 chapparvovirus sequences have been reported, including some that were  
11 identified in whole genome sequence (WGS) data derived from vertebrates,  
12 including reptiles, mammals, and birds (9). These sequences were picked up  
13 by *in silico* screens designed to detect EPV. However, since all the  
14 chapparvovirus sequences identified in WGS data lack clear evidence of  
15 genomic integration, it is thought likely that they actually derive from infectious  
16 chapparvovirus genomes that contaminated WGS samples, rather than from  
17 EPVs (9).

18       Until relatively recently, evidence that the chapparvoviruses detected  
19 via sequencing actually infect vertebrate hosts has been lacking. However, a  
20 recent study has claimed to demonstrate that a chapparvovirus called ‘mouse  
21 kidney parvovirus’ (MKPV) circulates among laboratory mice populations, in  
22 which it causes a kidney disease known as ‘inclusion body nephropathy’ (21).  
23 These findings imply that chapparvoviruses represent a potential disease  
24 threat to humans and domestic species. In addition, they have raised interest  
25 in the use of these viruses as experimental tools.

26       In this study, we perform comparative analysis of ChPV genomes and  
27 ChPV-derived EPVs, revealing new insights into the biology and evolution of  
28 this poorly understood group.

## 1 RESULTS

### 2 Identification and characterization of novel chapparvovirus sequences

3 We systematically screened published WGS data and identified a total  
4 of fifteen previously unreported, chapparvovirus-derived DNA sequences.  
5 Two were identified in vertebrates and thirteen in invertebrates (**Table 1**). The  
6 majority of the novel chapparvovirus sequences identified in our screen were  
7 derived from the replicase (*rep*) gene, but we identified complete sequences  
8 derived from both the *rep* and capsid (*cap*) genes in two species: the Gulf  
9 pipefish (*Syngnathus scovelli*) and the black widow spider (*Latrodectus*  
10 *hesperus*). Partial *cap* genes were identified in the scarab beetle (*Oryctes*  
11 *borbonicus*), taurus scarab (*Onthophagus taurus*) and Chinese golden  
12 scorpion (*Mesobuthus martensii*) elements (**Figure 1**).

13 Two of the novel sequences were identified in WGS assemblies of fish  
14 in the family Syngnathidae, including the tiger tail seahorse (*Hippocampus*  
15 *comes*) and the Gulf pipefish. The seahorse sequence clearly represented an  
16 EPV (**Figure 2a**), while the pipefish sequence lacked flanking genomic  
17 sequences and appeared to derive from an exogenous virus. In addition, all  
18 hits of invertebrate origin clearly represented EPVs (**Figure 2a**). However,  
19 none shared homologous flanking sequences, suggesting that they each  
20 derive from distinct germline incorporation events.

21 We used phylogenetic approaches to reconstruct the evolutionary  
22 relationships of newly identified chapparvovirus sequences to previously  
23 reported parvoviruses. We reconstructed evolutionary relationships using  
24 maximum likelihood-based approaches and an alignment spanning the  
25 tripartite helicase domain of the NS protein (**Figure 3a**). Strikingly,  
26 reconstructions indicated that the family *Parvoviridae* four major clades, rather  
27 than the two that have historically been recognised (1). Of the four major  
28 lineages, one corresponds to the subfamily *Parvovirinae* as recognised by  
29 current taxonomic schemes. However, the subfamily *Densovirinae* appeared  
30 to be split into two clades; one encompassing all ambisense densoviruses  
31 along with viruses of the genus *Iteradensovirus* (which have monosense  
32 genomes) and the second comprised by genera *Hepan-*, *Brevi-* and

1 *Penstyldensovirus*. Moreover, a fourth parvovirus lineage was evident,  
2 comprised of the ChPVs and ChPV-derived EPVs.

3 The branching relationships among ChPVs were not fully resolved by  
4 phylogenetic analysis of the helicase domain. The putative large replicase  
5 proteins (NS1) of ChPVs displayed a high degree of amino acid variability,  
6 particularly toward their N- and C-termini. However, a region ~500-aa-long  
7 could be aligned reliably throughout all complete and partial entries previously  
8 proven to cluster within the chapparvovirus lineage in case of the NS  
9 helicase-based inference. According to this, the ChPV clade is comprised of  
10 three significantly-supported monophyletic lineages. One of these includes  
11 ChPVs sampled from amniotes (reptiles, birds, and mammals), in which three  
12 further consistently well-supported sublineages could be observed (**Figure**  
13 **3b**). The amniote ChPVs form a sister clade to EPVs found in the arthropod  
14 subphyla Chelicerata (arachnids, camel spiders, scorpions, whip scorpions,  
15 harvestmen, horseshoe crabs and kin) and Myriapoda (millipedes, centipedes  
16 and kin) as well as with the syngnathic fish associated sequences. Within this  
17 clade, however, only the grouping of spider and syngnathic fish sequences  
18 was supported. A third lineage was also observed, containing sequences from  
19 the arthropod subphylum Hexapoda (insects, springtail, and forcepstail).  
20 Monophyly of the beetle EPVs is robustly supported (**Figure 3b**).

21

### 22 Comparative analysis of previously reported chapparvovirus genomes

23 We performed comparative analysis of nine previously sequenced  
24 ChPV genomes so that we might: (i) identify genome features that  
25 characterise these viruses, and (ii) make inferences about aspects of ChPV  
26 biology and evolution (**Figure 2b**). ChPV genomes tend toward the shorter  
27 end of the parvovirus genome size range (~4kb). They encode a relatively  
28 long *rep* gene, and a relatively short *cap* gene. The *rep* gene product (NS) is  
29 ~650 amino acids (aa) in length, with the longest example being the 668 aa  
30 long protein encoded by *Desmodus rotundus* chapparvovirus (DrChPV).  
31 Chapparvovirus NS proteins contain ATPase and helicase domains, but these  
32 are the only regions exhibiting clear homology to those found in other  
33 parvovirus groups (**Figure 2b**). Overlapping the *rep*, a predicted minor ORF,

1 ~220 aa in length, is located in a position equivalent to that of the  
2 nucleoprotein (NP) ORF found in certain *Parvovirinae* genera (i.e. *Ave-* and  
3 *Bocaparvovirus*). However, it should be noted that the polypeptide encoded  
4 by this gene – which we tentatively refer to as NP - exhibits no significant  
5 similarity to any other parvovirus NP proteins. Secondary structure predictions  
6 indicate that the vast majority of the NP protein has a mostly helical structure,  
7 with numerous possible phosphorylation sites as well as a potentially protein-  
8 binding disordered N-term (**Figure S2**). Together, these observations suggest  
9 a non-structural function. The NP ORF, although of similar length in all  
10 genomes, has no canonical start codon in case of porcine parvovirus 7  
11 (PPV7) and simian parvo-like virus 3 (SPV3). This would imply that in these  
12 viruses, splicing of the *rep* RNA is required for expression of the NP protein.

13 All chapparvoviruses appear to be characterized by relatively short VP  
14 sequences that are between 450- 500 aa in length, as opposed to ~650-820  
15 aa as found in most other parvoviruses (the exception being the brevi- and  
16 penstyldensoviruses which encode an even shorter VP). In all  
17 chapparvoviruses, the first methionine of the VP ORF is preceded by potential  
18 coding sequence, and in all published ChPV sequences, a canonical splice  
19 acceptor site is located immediately upstream. Possibly, the VP ORF encodes  
20 only the major capsid protein, and there may be other versions of this VP  
21 protein that are elongated at the N-terminus, and are incorporated into the  
22 capsid at a lower copy number, as found in the majority of parvoviruses (1).  
23 However, the only splice donor sites we identified are located relatively far  
24 upstream. In MKDV, however, there are two large introns present, putting  
25 these upstream exons in frame with the VP encoding exon.

26 The VP proteins of chapparvoviruses share no significant sequence  
27 similarity with those of other parvoviruses. Interestingly, however, structural  
28 similarity with erythro-, proto, and bocaparvoviruses can be detected for VP  
29 using fold recognition (**Figure 4**).

30 In addition to their fundamental NS-NP-VP genome organization,  
31 chapparvoviruses encode various additional small ORFs. ORF1 is predicted  
32 to encode a small protein of approximately 15 kDa that contains a putative  
33 nucleus localization signal (NLS) in its C-terminal region. ORF1, which



1 partially overlaps the N-terminal region of NS, is present in all genomes  
2 except PPV7. However, since the PPV7 genome also lacks the corresponding  
3 region of NS, this likely reflects a 5' truncated genome sequence. The same is  
4 the case for turkey parvovirus (TPV2), although the C-terminal encoding  
5 region of the putative ORF1 protein could be revealed.

6 A second additional, putative ORF is present in only two of the  
7 chapparviruses examined here: PPV7 and simian parvo-like virus 3. This  
8 ORF, referred to as ORF2, is located downstream from ORF1 in a position  
9 completely overlapping the NS ORF. The TPV2 genome also contains a  
10 unique, presumably genome-specific additional ORF (ORF4) that overlaps the  
11 C-term encoding region of VP, and may encode a predicted 17 kDa protein  
12 (**Figure 2b**). Interestingly, this ORF was absent from the other, closely-related  
13 avian entries.

14 Analysis *in silico* revealed at least three potential promoters in  
15 chapparvirus genomes. One of these is conserved throughout the clade,  
16 and is located upstream of all coding features, indicating that it likely drives  
17 early expression of virus genes. Moreover, its presence has been confirmed  
18 in MKDV by sequencing of cDNA derived from infected mouse tissue. None  
19 of the other potential promoters proved to be functional in case of MKDV,  
20 nevertheless. The MKDV transcriptome includes three confirmed transcripts  
21 to undergo splicing. Out of these, however, only the one with the shortest  
22 intron could be predicted to exist in case of all examined GenBank entries  
23 (**Figure 2b**). Interestingly, DrChPV, along with further rodent-derived ChPVs  
24 was predicted to possess the large intron of the putative VP transcript, hence  
25 displaying a strikingly MKDV-like transcription mechanism, despite of missing  
26 an acceptor site upstream the NP start codon.

27 In all ChPVs examined, with the exception of the 5' truncated entries,  
28 we identified two potential polyadenylation signals in positions equivalent to  
29 those found in MKDV (Roedinger et al 2018), This implies that the  
30 polyadenylation strategy is a conserved feature of chapparvirus  
31 transcription.

32

33 Characterization of syngnathid chapparviruses and EPVs



1 We identified two chapparvoviral sequences in syngnathid fish. One of  
2 these, identified in the genome of the Gulf pipefish (*Syngnathus scovelli*)  
3 occurred within a relatively short scaffold (4002 nt). The entire scaffold was  
4 comprised of viral sequence, displaying truncated but nonetheless detectable  
5 J-shaped terminal hairpin-like structures (**Figure S1**). This suggests it likely  
6 represents a virus contaminant, as suspected for other ChPV sequences  
7 recovered from vertebrate WGS data (9). The virus from which this sequence  
8 was presumably derived was designated *Syngnathus scovelli* chapparvovirus  
9 (ScChPV). The ScChPV genome encodes a long NS ORF (807 aa), a  
10 strikingly short VP (367 aa) and a ChPV-like NP. Furthermore, a homologue  
11 of the ORF2 protein found in the amniote parvoviruses PPV7 and SPV3 was  
12 present. A predicted ORF was present in a genomic position equivalent to that  
13 of ORF1, found in amniote ChPVs. However, the predicted protein sequence  
14 did not disclose any detectable similarity to its amniote counterpart. ORF6,  
15 identified in partial overlap with the VP C-term encoding region, has the  
16 capability to encode a small protein of 27.2 kDa (239 aa), which demonstrated  
17 no sequential similarity to any GenBank entries to date. Fold recognition,  
18 however, revealed possible structural similarity to viral structural proteins,  
19 including the major envelope glycoprotein of Epstein-Barr virus (PDB ID:  
20 2H6O chain A, p=0.012), the minor viral protein of the Sputnik virophage  
21 (PDB ID: 3J26, chain N, p=0.017) and the surface region of *Galleria*  
22 *mellonella* ambidensovirus (PDB ID: 1DNL, p=0.021) (**Figure 4**). These  
23 findings imply ORF6 may encode an additional structural protein in addition to  
24 VP.

25 A partial ChPV-like sequence identified in the genome of the tiger  
26 seahorse (*Hippocampus comes*) was flanked by extensive stretches of host  
27 genomic sequence, establishing that, unlike the ScChPV sequence identified  
28 in the Gulf pipefish genome assembly, it likely represents an EPV rather than  
29 a virus. Interestingly, however, phylogenies showed that both sequences  
30 obtained from syngnathid fish are relatively closely related, and cluster  
31 together with high bootstrap support (**Figure 3a and b**).

32

33 Characterization of chapparvovirus-derived EPVs in invertebrate genomes

1 Via screening of WGS data derived from invertebrate species, we  
2 identified a total of 13 EPV sequences that disclosed a relatively close  
3 phylogenetic relationship to ChPVs. These elements showed varying degrees  
4 of degradation (**Figure 1**). In many cases only genome fragments were  
5 detected, and these usually included numerous nonsense mutations (**Table**  
6 **1**). ChPV-derived elements were detected in three major arthropod clades  
7 that primarily occupy terrestrial habitats, namely arachnids of Chelicerata,  
8 chilopods of Myriapoda, as well as hexapod insects and entognaths.

9 Among the EPVs we identified, the most complete were identified in  
10 the Western black widow spider (*Latrodectus hesperus*). Two elements  
11 spanned the *rep*, *cap*, and NP genes, and a homologue of the *orf1* gene  
12 found in ScChPV (**Figure 2a**). At aa level of the putative NS1, however, these  
13 elements displayed only 62% identity. Although the *rep* of the element  
14 ChPV.2-*Latrodectus hesperus* appeared to encode the complete, 690-aa-long  
15 protein product, this ORF contained nonsense mutations in case of the other  
16 arachnid element, ChPV.3-*Latrodectus hesperus* (**Table 1**). In contrast,  
17 ChPV.3-*Latrodectus hesperus* displayed an undisrupted ORF1 of 113 aa, a  
18 slightly smaller homologue of its ScChPV counterpart as well as an intact *cap*,  
19 capable of encoding a 386-aa-long VP. In ChPV.2-*Latrodectus hesperus* only  
20 an N-term truncated ORF1 was present at the length of 37aa, along a *cap*  
21 disrupted by several nonsense mutations. Furthermore, the *cap* of this  
22 element was found to include an insertion of 74 aa, suspected to originate  
23 from a yet unknown repetitive element (revealed by sequence comparisons to  
24 be interspersed throughout the *L. hesperus* genome). ChPV.3-*Latrodectus*  
25 *hesperus* from the other hand, appeared to include an intact upstream region  
26 of the genome, revealing an additional small ORF of 81 aa length directly  
27 upstream the ScChPV ORF1 homologue, designated ORF1-Lh. This ORF  
28 disclosed no detectable homology to any entries to date. Upstream this ORF  
29 a potential promoter sequence could be revealed with high confidence (0.98  
30 of 1). Both elements included complete, NP-encoding ORFs of 233 aa,  
31 although a canonical ATG start codon could be revealed only in case of one  
32 element (ChPV.3-*Latrodectus hesperus*).

1 We revealed the existence of two more elements in the Western black  
2 widow spider genome, although these only spanned the *rep* gene, disrupted  
3 by several nonsense mutations. However, one element (ChPV.4-*Latrodectus*  
4 *hesperus*) encoded nearly complete NS and NP genes, as well as a complete  
5 homologue of the ScChPV ORF1 gene. The true extent of preservation could  
6 not be assessed for this EPV as it occurred on a short scaffold that terminated  
7 within the EPV *rep* sequence. The putative NS1 was 0.8% identical to its  
8 counterpart in ChPV.2-*Latrodectus hesperus* at aa level. Interestingly, directly  
9 upstream this EPV another copy of the *rep* was present, encoding only the  
10 first 221 aa of the putative NS1 protein. This element also contained a  
11 complete ScChPV ORF1 homologue as well as ORF1-Lh, which did not  
12 display an ATG start codon in this case. The upstream promoter could only be  
13 identified with a much lower score of 0.6. ChPV.5-*Latrodectus hesperus*  
14 displayed a highly divergent, partial *rep* of 216 aa with only 0.42% identity to  
15 the ChPV.2-*Latrodectus hesperus* NS1 at aa level (**Figure 1**). This element  
16 clustered outside the monophyletic branch comprised by the three other EPVs  
17 of the same species (**Figure 3**).

18 A single chapparvovirus-derived EPV was identified in a second  
19 arachnid species - the Chinese golden scorpion (*Mesobuthus martensii*). This  
20 element was identified in a relatively short unplaced scaffold, and comparison  
21 to the *Latrodectus* elements indicated that the contig was truncated within the  
22 EPV, and consequently the true extent of its preservation could not be  
23 assessed. Nevertheless, ORFs disclosing homology to the NS, NP and VP  
24 proteins could be identified. While the first 100 or so codons of the NS ORF  
25 were absent, a complete NP ORF was detected, along with the first 46  
26 codons of VP. All three ORFs were disrupted by frameshifts and stop codons  
27 (**Table 1**). No homologues of any alternative ORFs identified in other  
28 chapparvovirus genomes could be revealed.

29 We identified a chapparvovirus-derived EPV in the genome of a  
30 myriapod - the European centipede (*Strigamia maritima*). This element  
31 displayed partial homologues of the NS and NP encoding ORFs, both of  
32 which contained large deletions (**Figure 2b**) as well as numerous nonsense  
33 mutations (**Table 1**). Moreover, the NS ORF was disrupted by an extensive

1 stretch of an insertion of unknown origin. No homologues of any of the above-  
2 mentioned alternative chapparvoviral ORFs could be identified in this  
3 endogenous sequence.

4 Seven chapparvovirus-derived EPVs were identified in hexapod  
5 arthropods (subphylum Hexapoda). One occurs in the genome of a bristletail  
6 species - the Northern forcepstail (*Catajapyx aquillonaris*) - belonging to the  
7 entognath order Diplura. The other six were identified in three species  
8 belonging to the vast insect order Coleoptera: the emerald ash borer (*Agrilus*  
9 *planipennis*), the taurus scarab (*Onthophagus taurus*), and the scarab beetle  
10 (*Oryctes borbonicus*). The bristletail element contains a C-terminal truncated  
11 *rep* of at least 250 aa and a near full-length NP ORF. The partial *rep* was  
12 intact, but the NP ORF is disrupted and highly divergent, showing significant  
13 sequence similarity only in the conserved core region of the putative protein.  
14 The ash borer element occurs in a scaffold that is ~1 kb in length. One end of  
15 this scaffold contains 592 nt region exhibiting homology to the NS ORF, which  
16 harboured an N-terminal deletion of at least 200 aa.

17 In the case of the taurus scarab element ChPV.10-*Onthophagus*  
18 *taurus*, the almost complete NS ORF could be identified, disrupted by  
19 numerous nonsense mutations (**Table 1**). Interestingly, another endogenous  
20 element of parvoviral origin was detected at the same locus. This element  
21 encodes an intact, potentially fully-expressible NS gene, homologous to the  
22 NS1 of ambidensoviruses (genus *Ambidensovirus*) and discloses similarity to  
23 a recently reported ambidensovirus species, detected only at cDNA level in  
24 the transcriptome of two bumble bee species (*Bombus cryptarum* and *B.*  
25 *terrestris*) (22). An additional ORF was present in this ambidensoviral  
26 element, overlapping the reputative NS1 gene, which harboured no significant  
27 similarity to any sequences deposited to GenBank to date. In its derived aa  
28 sequence, however, a homeobox domain could be revealed, also in intact,  
29 potentially expressible state. The other two elements of the taurus scarab  
30 genome located in the same assembly scaffold, only 2540 nts apart from each  
31 other. Both EPV consisted of only a partial ORF, which disclosed similarity to  
32 chapparvoviral *reps*. None of these elements encompassed the tripartite  
33 helicase domain, hence they were not included in phylogenetic inference.

1 Two EPVs were derived from the scarab beetle genome. One of these,  
2 designated ChPV.13-*Oryctes borbonicus*, harboured a near complete *rep* at  
3 402 aa as well as a short, partial *cap*, capable of encoding only the first 33 aa  
4 of the putative VP. The region of *rep* homology occurred within an ORF that  
5 was not disrupted by any frame shifts and extended without disruption  
6 upstream and downstream, suggesting a putative longer gene product -  
7 potentially encoding a longer, divergent NS protein - to be present. However,  
8 these regions did not disclose sequence similarity to any proteins hitherto  
9 deposited to GenBank. The *Oryctes* element (EPV-ChPV.14-*Oryctes*), in  
10 contrast, included only a heavily truncated NS of 254 aa (**Figure 1**).

11

### 12 Structural characteristics of chapparvovirus capsids

13 We built 3D homology models to facilitate comparison of  
14 chapparvovirus capsid structures to those found in other parvoviruses. The  
15 derived polypeptide sequence of the complete VP ORF encoded by DrChPV  
16 was subjected to fold recognition, to identify suitable templates for homology  
17 modelling. This comparative analysis showed that the most similar VP protein  
18 occurs in parvovirus H1 (genus *Protoparvovirus*) (PDB ID: 4G0R,  $p=9e-05$ ),  
19 and this sequence was therefore used as the template for homology  
20 modelling. To overcome the stochastic aspect of model construction, due to  
21 the lack of sequence identity and the non-homologous nature of the ChPV VP  
22 genes to other parvoviral VPs, we used the final model obtained in this  
23 analysis as a template for analysis of four further ChPVs - rat parvovirus 2,  
24 PPV7, TPV2, and pit viper chapparvovirus. The pitfalls of using models as  
25 templates has to be noted here, however, this method ensured that only those  
26 regions showed structural variability, which would probably do so in case of  
27 the actual capsid structures.

28 We examined the VP sequences of two representatives of the second  
29 major ChPV clade (**Figure 3b**) – one derived from a presumably exogenous  
30 virus (ScChPV) and one from an EPV (ChPV.3-*Latrodectus*). Fold recognition  
31 identified, for the VP protein encoded by ScChPV dependoparvovirus VP  
32 proteins as potential templates (adeno-associated virus 8, PDB ID: 2QA0,  
33  $p=8e-04$ ; Adeno-associated virus rh32.33, PDB ID: 4IOV,  $p=9e-04$ ), while for

1 the VP encoded by the black widow spider EPV the most reliable hit was the  
2 VP4 protein of an iteradensovirus (*Bombyx mori* iteradensovirus, PDB ID:  
3 3P0S,  $p=8e-04$ ). When superimposing the obtained models with the VPs of  
4 AAV8 and BmDV, however, structural similarity only covered the jelly roll core  
5 and the  $\alpha$ A helix, whereas only the EC loop out of the traditionally more  
6 variable surface loops.

7 Modelling indicated that the ChPV VP monomer harbours an eight-  
8 stranded  $\beta$ -barrel 'jelly roll' core and the  $\alpha$ A helix at the twofold symmetry axis  
9 as found in all members of the family *Parvoviridae* to date (23) (**Figure 4a**).  
10 Equivalent of all short strands were present ( $\beta$ -C, H, E, F), as well to four out  
11 of the five longer strands ( $\beta$ -B, D, I, G). However, no structural analogue to the  
12 outmost  $\beta$ -A could be identified (**Figure 4**). Examining the secondary structure  
13 prediction results further disproved the existence of a  $\beta$ -A analogue, indicating  
14  $\beta$ -B to be the closest to the N-term. The first strand of the *Syngnathus scovelli*  
15 ChPV VP, appeared to fold outside of the jelly roll, leaving the longer side of  
16 the barrel without a  $\beta$ -B, comprised of only three strands, namely D, I and G,  
17 despite of a complete upper, CHEF sheet (**Figure 4**). When modelling the  
18 complete T=1 capsid polymer, this manifested as a hole, which is normally  
19 covered by  $\beta$ -B even in case of the smallest parvoviral capsids (**Figure 4b**).  
20 All ChPVs as well as the only ChPVe VPs displayed two canonical loops  
21 surrounding their fivefold axes, linking sheets D with E at the channel and  
22 sheets H with I on the floor surrounding the channel. In case of the amniote  
23 ChPVs, the pore displayed a tight opening. The sequence of the DE loop  
24 varied to some extent among these seven entries, which also manifested in  
25 the models. The HI loop was, however, highly conserved throughout,  
26 containing only one variable position between the amniote ChPVs.

27 We mapped the chapparvoviral VRs identified by VP alignments  
28 (**Figure S3**) to both VP monomers and complete capsids, to examine how  
29 they manifest on the virion surface and make comparisons to parvoviruses of



1 known structure, represented by the minute virus of mice (MVM) capsid  
2 structure, as the prototype virus of subfamily *Parvovirinae* (PDB ID: 1Z14)  
3 (**Figure 4**). Out of ten chapparvoviral VRs identified (VR 1 to 10), presented  
4 by **Figure S3a** only VR1, VR2, and VR9 proved to be similarly positioned,  
5 hence probably analogous to the parvoviral counterparts. Some VRs  
6 appeared to be positioned at luminal surface of the chapparvovirus capsid  
7 (VR4 in all cases and VR8 of the amniote ChPVs, whereas VR6 of the  
8 *Latrodectus* element and ScChPV), unlike all parvoviruses studied to date  
9 with the exception of bovine parvovirus, a bocaparvovirus (24) in which VRVIII  
10 shows this configuration. Since the ChPV VRs appeared to be non-  
11 homologous to those established for either proto- or dependoparvoviruses, we  
12 re-defined them by numbering from N to C-term.

13 In addition to their distinctive VRs, ChPVs ubiquitously appeared to  
14 harbor a highly variable C-terminal region, with a length varied between 12 to  
15 62 residues. The ChPV VP variable C-term appears to be buried in most  
16 cases with the exception of ScChPV, where it is probably exposed. In case of  
17 the *Latrodectus* element, it forms the luminal surface of the threefold, whereas  
18 in the case of fish and amniote ChPVs it is located at the twofold (**Figure 4a**).

19 The *ScChPV* and *ChPV.3-Latrodectus hesperus* VP lacked a VR6  
20 homologous to that of the amniote ChPVs albeit displayed variation in another  
21 position instead, still in the sixth-place counting from the N-term (**Figure S3b**).  
22 Moreover, both of them displayed truncated VRs 3, 5, and 7, compared to  
23 their amniote counterparts. VR9, furthermore, was absent from the ScChPV  
24 VP, whereas VR 10 was missing from the VP of *ChPV.2-Latrodectus*  
25 *hesperus* (**Figure S3b**). As for the surface, the largest variable region for  
26 amniote ChPVs, namely DrChPV is VR7, forming the entire three-fold  
27 protrusions, with VRs 1, and 9, forming small protrusions surrounding the  
28 aforementioned peaks.

29 The complete capsid models of non-amniote chapparvoviruses were  
30 observed to harbor surface features that are strikingly distinct from those of  
31 the amniote ones, more closely resembling the capsids of the  
32 *Ambidensovirus-Iteradensovirus* clade of *Densovirinae* (see **Figure 3a**), with  
33 a surface that is less spikey (**Figure 5**).



1 We also constructed a homology model of ORF6 of ScCHPV, based on  
2 the minor viral protein of the Sputnik virophage (PDB ID: 3J26). This protein  
3 appears to harbor multiple beta strands close to its C-term, out of which the  
4 outermost could potentially fill in the aforementioned gap, caused by the lack  
5 of a  $\beta$ B (**Figure 4b**).

6

## 7 **DISCUSSION**

8 Historically, the family *Parvoviridae* has always been comprised of two  
9 subfamilies, with specificity for vertebrate or invertebrate hosts being the  
10 major demarcation criterion (2). This division was initially supported by  
11 phylogenetic inference, however, as the number of densoviral genera  
12 increased, the heterogeneity of densoviruses, specifically their segregation  
13 into two clades, has not gone unnoticed (1). Our study provides further  
14 evidence that the traditional division of parvoviruses into vertebrate-specific  
15 and invertebrate-specific subfamilies no longer holds - rather, it supports the  
16 division of the *Parvoviridae* into four major subgroups: the *Parvovirinae*, a split  
17 *Densovirinae*, and the Chapparvoviruses as illustrated in **Figure 3a**.

18 The data presented here show that chapparvoviruses infect an  
19 exceptionally broad range of hosts, including both vertebrates and  
20 invertebrates. Furthermore, we show that chapparvoviruses found in fish are  
21 more closely related to those that infected ancestral arachnoid arthropods  
22 than they are to those that infect amniote vertebrates such as rodents (**Figure**  
23 **3b**). These findings suggest that chapparvoviruses have been transmitted  
24 between distantly related host species in the past.

25 Phylogenies indicate that all amniote ChPVs have a common origin  
26 (**Figure 3a**), consistent with the overall conservation of their genome  
27 organization and some aspects of predicted transcriptional strategy (**Figure**  
28 **2b**). Previous studies suggested that these viruses might have broadly co-  
29 diverged with host species (9). The present, expanded data set implies that  
30 some transmission of ChPVs between distantly related vertebrate classes  
31 may have occurred among (**Figure 3b**) - though it should be kept in mind that  
32 almost all amniote ChPVs have been identified via metagenomic sequencing

1 of environmental samples, mostly fecal viromes, thus their true host affiliations  
2 remain uncertain.

3 Sequences derived from parvoviruses occur relatively frequently in  
4 animal genomes (13, 14, 17, 25, 26). However, these sequences  
5 overwhelmingly derive from a small proportion of parvovirus lineages. For  
6 example, ambidensovirus-derived EPVs dominate invertebrate genomes (14),  
7 whereas vertebrate EPVs almost exclusively derive from  
8 dependoparvoviruses, protoparvoviruses, or viruses closely related to these  
9 two genera (12, 13, 25, 26). In this study we found no trace of ChPV-derived  
10 sequences in tetrapod genomes, despite recent evidence that ChPVs infect  
11 this host group (21). By contrast, ChPV-derived sequences are relatively  
12 common in arthropods, with the genomes of some species harboring multiple,  
13 independently acquired ChPVs (**Table 1**). The tendency of EPVs to derive  
14 from a subset of parvovirus genera likely has biological underpinnings. For  
15 example, in vertebrates it may reflect the tendency of dependoparvoviruses to  
16 integrate into host DNA, and/or the requirement of protoparvoviruses to  
17 initiate DNA damage response (DDR) during replication (27, 28). Similar  
18 features of the viral life cycle could account for the biased distribution of  
19 ChPV-related sequences in species genomes - i.e. arthropod and fish ChPVs  
20 might have adopted a replication strategy that favors germline integration,  
21 whereas that of amniote ChPVs precludes it. Notably, some arthropod  
22 species have integration sites containing multiple independently acquired  
23 EPVs of both ChPV and ambidensovirus origin, suggesting that hotspots of  
24 parvovirus integration and/or fixation might exist in their genomes.

25 Our discovery of ChPV-derived elements in fish and arthropod  
26 genomes establishes that ChPVs can infect these species in addition to  
27 mammals (21). Moreover, it provides evidence that the ChPVs are probably  
28 an ancient lineage of parvoviruses. Although we did not identify any  
29 orthologous ChPV insertions, the EPVs described here show extensive  
30 evidence of germline degradation. Through comparison to studies of EPVs in  
31 mammals (in which several orthologous EPVs have been described), it  
32 appears likely that chapparvoviruses have been present in animals for many  
33 millions of years. Moreover, as the hexapod EPVs appear to be monophyletic

1 and mirror the evolution of their host species, the age of ChPVs could  
2 possibly correlate with the Insecta-Entognatha split, suggesting a minimum  
3 age of 400 million years (29).

4 Through comparative analysis of EPVs and chapparvoviruses, we  
5 show that chapparvovirus genomes exhibit a number of defining  
6 characteristics. Firstly, all possess a short, monosense genome, encoding a  
7 relatively large NS and a relatively short VP. The short VP proteins of ChPVs  
8 are clearly homologous to one another, but show no similarity to those found  
9 in other parvovirus lineages. Similar to those found in the penstyl-, hepan- and  
10 brevidensoviruses, the VP proteins of ChPVs lack PLA2 domains. Notably  
11 these are also the genera to which ChPVs are most closely related in NS-  
12 based phylogenies (**Figure 3a**).

13 Secondly, chapparvoviruses typically encode multiple additional gene  
14 products besides the replicase and capsid. To begin with, almost all encode a  
15 nucleoprotein (NP) gene in an overlapping frame with *rep*. In this report, we  
16 show that putative NP ORFs are present in ChPV-derived EVEs, suggesting it  
17 is an ancestral, conserved feature of these viruses. It's absence, however,  
18 from the coleopteran lineage is intriguing, as it is still present in the EPV of the  
19 hexapod stem group Diplura of Entognatha. Phylogenetic reconstructions  
20 (and the extensive overlap with *rep*) imply it was acquired ancestrally and  
21 independently lost in the lineage derived from members of the hexapod crown  
22 group, Coleoptera (**Figure 3b**).

23 ChPV genomes appear to encode several predicted auxiliary ORFs in  
24 addition to NP. A functional role for auxiliary ORF1 is supported by (i) it's  
25 conservation across the entire amniote ChPV clade, and; (ii) limited  
26 experimental data indicating it is expressed in MKPV via a spliced transcript.  
27 Auxiliary ORF2 was only identified in a small subset of ChPV genomes, but a  
28 functional role for this ORF is suggested by the presence of homologues in  
29 distantly related ChPVs of amniotes and fish (see **Figure 3b**). Interestingly,  
30 although all ChPVs appear to express ORF1 via splicing of a small intronic  
31 sequence (**Figure 2**), those harboring an ORF2 homologue are predicted to  
32 lack the peculiar large introns found in expression of MKPV NP and VP  
33 transcripts (21). ScChPV lacks an ORF1 homolog, but contains a predicted

1 reading frame in the corresponding position. Homologues of this ScChPV  
2 ORF1 variant are present in all three arachnid EPVs, although not in the first,  
3 but in the second position. As only the three *Latrodectus* EPVs possess a  
4 homologue of ORF1-Lh, it is possible that this small ORF became  
5 incorporated only after the split from the syngnathid fish lineage, whereas the  
6 incorporation of ScChPV ORF1 predates it. The distribution of homologous  
7 auxiliary genes across phylogenetic lineages of ChPVs implies that distinct  
8 lineages have acquired and/or lost these genes on multiple, independent  
9 occasions.

10 MKPV has been reported to possess only one promoter and two  
11 polyadenylation signals, as well as an extensive number of spliced transcripts.  
12 This transcription pattern, however, appears to be unique to only one lineage  
13 of the amniote ChPVs, comprising of rodent, chiropteran, primate, and  
14 reptilian entries. As both the avian ChPV sister clade as well as the lineage  
15 including PPV7 appear to display genome organization specific for these  
16 groups suggesting that ChPVs infecting host groups outside of the MKPV  
17 lineage may utilize distinct transcription strategies.

18 Despite the potential pitfalls of homology modeling, and the use of  
19 distinct templates to reconstruct both the VP monomer and capsid structures,  
20 we obtained remarkably similar predicted structures for VP sequences found  
21 in closely related viruses/EPVs. Since the viral capsid plays an important role  
22 in mediating the interactions between parvoviruses and their hosts,  
23 comparisons of capsid structures can potentially reveal insights into  
24 parvovirus biology. Homology modelling indicated that ChPV VPs would  
25 assemble into a complete, T=1 icosahedral capsid, despite their relatively  
26 small size. Furthermore, their predicted structures are remarkably similar to  
27 that found in other parvoviruses, despite the lack of any detectable similarity  
28 in the sequences of their VP proteins. Similarities include the presence of a  
29 conserved jelly roll core and  $\alpha$ A helix, the existence of the DE and HI loops,  
30 and the presence of identifiable VRs. Interestingly, the amniote ChPV  
31 capsids appear to possess the same number of VRs as most of the vertebrate  
32 parvoviruses of subfamily *Parvovirinae*, even if only a few of them (namely  
33 VRs 1, 2 and 9) proved to be analogous features. In these virus capsids,

1 variations were most prominent among the threefold peaks and protrusions as  
2 well as the two-fold depression, as observed in members of the *Parvovirinae*  
3 (**Figure 5**). The tendency of some VRs to manifest at the luminal surface of  
4 the capsid in models suggests these regions could play a role in intracellular  
5 host-virus interactions. However, in order to become accessible to interact  
6 elements of intracellular signaling pathways, either uncoating would be  
7 necessary, or potential conformational changes to expose these regions.  
8 Based on previous findings, however, the parvovirus capsid appears to traffic  
9 into the nucleus intact (30, 31). Considering this, these buried regions might  
10 play a role in processes linked to the nucleus. Interestingly, however, bovine  
11 parvovirus, the only other parvovirus in which buried VRs have previously  
12 been observed (32), is an enteric pathogen, and metagenomic studies  
13 suggest that amniote ChPVs (with the exception of MKPV) are also enteric.

14 In addition to the VRs, all ChPVs seem to harbor highly-variable VP C-  
15 terms. A similar phenomenon has been observed in case of  
16 iteradenoviruses, where the last 40 C-terminal residues are disordered and  
17 their structure could not be resolved (33). Although the location of the ChPV  
18 C-term appears to vary, its association with regions that are overtly involved in  
19 parvovirus-host interactions (e.g. the two- and threefold peaks) is certainly  
20 intriguing.

21 MKPV is associated with pathology of the urogenital system, whereas  
22 a related virus - murine ChPV - has been detected at very high prevalence in  
23 murine liver tissue suggesting it is a gastrointestinal agent (34). The VPs of  
24 the two, however, only differ in six aa residues, located within VR 3 and near  
25 VR2 on the surface and in the buried VR4 as well as in the similarly buried  
26 variable C-term (**Figure S3a**). Thus, these positions could constitute potential  
27 determinants of tissue tropism in murine ChPVs. Parvoviruses subfamilies  
28 *Parvovirinae* and *Densovirinae* utilize distinct strategies to stabilize their  
29 icosahedral capsids (35). Vertebrate parvoviruses extend the longer side of  
30 the jellyroll fold with an additional, N-terminal strand by folding back  $\beta$ -A to  
31 interact with the twofold axis of the very same monomer, hence creating an  
32 extended ABDIG sheet (36, 37). By contrast, the densovirus capsid preserves

1 the symmetric arrangement of the jellyroll fold, and possesses a  $\beta$ -A which is  
2 a direct elongated N-terminal extension of the  $\beta$ -B instead, interacting with the  
3  $\beta$ -B strand of the neighboring monomer toward the fivefold axis (38, 39).  
4 Strikingly, our data show that ChPV capsids lack  $\beta$ -A strands (and also the  $\beta$ -  
5 B strand in the case of ScChPV). The functional implications of this are  
6 unclear - possibly ChPV capsids are stabilized in the absence of  $\beta$ -A via a yet  
7 unknown, additional VP. If ChPVs express additional structural proteins, they  
8 are presumably encoded by spliced transcripts (given the unusually small size  
9 of the *cap* gene). Alternatively, the ChPV capsid might assemble without the  
10 incorporation of an additional  $\beta$  strand, perhaps at the cost of losing the  
11 stability and resilience typical of parvoviruses in general. Potentially, this could  
12 account for the apparent presence of buried VRs. Interestingly, in studies of  
13 MKPV, viral proteins could be detected in the kidneys of infected mice even  
14 though no assembled particles could be observed in inclusion body-affected  
15 tubular cells (21). This, along with our structural predictions, suggests that the  
16 ChPV strategy for uncoating and cellular trafficking might be very different  
17 from that found in the *Parvovirinae* and *Densovirinae*.

18 Uniquely, the genome of ScChPV appears to include a putative  
19 additional structural protein (ORF6), in addition to the above-mentioned  
20 alternative ORFs. All parvoviruses to date - except those of genus  
21 *Penstylidensovirus* (39) - have been reported to incorporate up to three  
22 additional minor capsid proteins into the virion, which share a common C-  
23 terminal region. To encode a structural protein on an entirely separate ORF  
24 sharing no mutual coding sequence with *cap* would be unique. Possibly, this  
25 unusual feature could be connected to the predicted lack of a  $\beta$ -B strand in  
26 ScChPV VP protein.

27 Taken together, the data presented here establish that the ChPVs  
28 belong to a parvovirus lineage that comprises a distinct lineage from all other  
29 parvoviruses, and infects an exceptionally broad range of host species,  
30 including both vertebrates and invertebrates. Consistent with this, their



1 relatively complex genomes exhibit numerous unique features, implying their  
2 life cycle might significantly differ from what has been established in case of  
3 other members of the family. These findings underscore the need for further  
4 basic and comparative studies of ChPVs, both to assess their potential impact  
5 on animal health, both wildlife and livestock. Furthermore, this is the first study  
6 to imply that vertebrate parvoviruses are not monophyletic, as well as  
7 members of the family must have evolved to infect vertebrates on at least two  
8 separate occasions.

9

## 10 **METHODS**

### 11 Genome screening and sequence analysis

12 WGS data were screened for chapparvovirus sequences using the  
13 database-integrated genome screening (DIGS) tool (40). ChPV sequences  
14 were characterized and annotated using Artemis Genome Browser (41). The  
15 BLAST program was used to compare sequences and investigate predicted  
16 viral ORFs. To determine potential homology and sequence similarity even  
17 between previously undescribed ORFs, we constructed a local database by  
18 including all ORFs exceeding 100 aa in length derived from all the exogenous  
19 and endogenous sequences incorporated into this study and used the local  
20 BLAST P and X algorithms to conduct similarity searches in it. Two ORFs  
21 were accepted as homologous if they gave a significant hit in case of an  
22 expectation value threshold of 1.

23 Promoters were predicted using the neural network-based promoter  
24 prediction server of the Berkeley Drosophila Genome Project and further  
25 verified by the Promoter Prediction 2.0 server (42, 43). Splice sites were also  
26 detected using the neural network-based applications of the Berkeley  
27 Drosophila Genome project and SplicePort (43, 44). Polyadenylation signals  
28 were predicted by the SoftBerry application POLYAH (45). To verify the  
29 suitability of these applications to be capable of detecting the above  
30 mentioned chapparvoviral transcription elements we ran MKDV through the  
31 workflow pipeline.

32

### 33 Phylogenetic reconstructions



1           The derived aa sequences of ORFs disclosing homology to parvoviral  
2 NS1 proteins were aligned with at least five representatives of each genera of  
3 Parvoviridae, or with one representative of each species of given genus in  
4 case the number of species did not exceed five. To ensure the correct  
5 identification of the tripartite helicase domain, structural data was also  
6 incorporated into alignment construction using T-coffee Espresso (46) and  
7 Muscle (47). The full-length NS1 derived aa sequences of the chapparvovirus  
8 clade were aligned by Muscle and the M-coffee algorithm of T-coffee (48).  
9 Model selection was carried out by ProTest and the substitution models  
10 RtREV+I+G in case of the helicase-based inference and LG+I+G for the  
11 complete chapparvoviral NS1 tree were predicted to be the most suitable  
12 based on both Akaike and Bayes information criteria. To infer the maximum  
13 likelihood phylogenetic tree the PhyML-3.1 program was used with 100  
14 bootstrap iterations (49), based on a guide tree previously constructed by the  
15 ProtDist and Fitch programs of the Phylip 3.697 package (50).

16

### 17 Homology modelling and DNA structure prediction

18           Structural homology was detected by applying the pGenTHREADER  
19 and pDomTHREADER algorithms of the PSIPRED Protein Sequence  
20 Analysis Workbench (51). The same workbench was used to map disordered  
21 regions using DISOPRED3 and to predict the secondary structure of the  
22 complete chapparvoviral VP protein sequences via the PSIPRED algorithm.  
23 The selected PDB structures were applied as templates for homology  
24 modeling, carried out by the I-TASSER Standalone Package v.5.1 (52). To  
25 guide the modelling, the predicted secondary structures were applied as a  
26 restriction. 60-mers of the acquired purative VP monomer structures were  
27 constructed by the Oligomer Generator feature of the Viper web database  
28 (<http://viperdb.scripps.edu/>) (53). Surface images of the capsids were  
29 rendered using the PyMOL Molecular Graphics System (54). Capsid surface  
30 maps and VP monomer superposition were carried out by UCSF Chimera  
31 (55). To predict the presence of potential DNA secondary structural elements  
32 the DNA Folding Form algorithm of the mFold web server was utilized (56).

33

1 **Table 1. Novel chapparvovirus sequences identified in this study**

2

| Host common name     | Host scientific name         | ID <sup>a</sup> | Gene content <sup>b</sup> | Nonsense Mutations (stop codons; frame shifts) |
|----------------------|------------------------------|-----------------|---------------------------|------------------------------------------------|
| <b>Vertebrates</b>   |                              |                 |                           |                                                |
| Gulf pipefish        | <i>Syngnathus scovelli</i>   | ScChPV          | <u>rep+cap</u>            | 0; 0                                           |
| Tiger tail seahorse  | <i>Hippocampus comes</i>     | ChPV.1          | <u>rep</u>                | 2; 2                                           |
|                      |                              | ChPV.2          |                           |                                                |
| <b>Invertebrates</b> |                              |                 |                           |                                                |
| Black widow spider   | <i>Latrodectus hesperus</i>  | ChPV.3          | <u>rep+cap</u>            | 4; 1                                           |
|                      |                              | ChPV.4          | <u>rep+cap</u>            | 3; 1                                           |
|                      |                              | ChPV.5          | <u>rep</u> *              | 3; 3                                           |
|                      |                              | ChPV.6          | <u>rep</u>                | 4; 2                                           |
| Chinese scorpion     | <i>Mesobuthus martensii</i>  | ChPV.7          | <u>rep+cap</u> *          | 2; 3                                           |
| European centipede   | <i>Strigamia maritima</i>    | ChPV.8          | <u>rep</u>                | 2; 3                                           |
| Northern forcepstail | <i>Catajapyx aquilonaris</i> | ChPV.9          | <u>rep</u>                | 0; 0                                           |
| Emerald ash borer    | <i>Agilus planipennis</i>    | ChPV.10         | <u>rep</u> *              |                                                |
| Taurus scarab        | <i>Onthophagus taurus</i>    | ChPV.11         | <u>rep</u>                | 2; 3                                           |
|                      |                              | ChPV.12         | <u>rep</u>                | 0; 0                                           |
|                      |                              | ChPV.13         | <u>rep</u>                | 2; 1                                           |
| Rhinoceorous beetle  | <i>Oryctes borbonicus</i>    | ChPV.14         | <u>rep</u>                | 2; 0                                           |
|                      |                              | ChPV.15         | <u>rep</u>                | 0; 0                                           |

3

4 **Footnote:** <sup>a</sup> For sequences that are presumed to derive from viruses, the proposed name of the virus is  
5 shown. <sup>b</sup> Underlined names indicate the presence of the complete ORF. For endogenous parvoviral  
6 elements (EPV) the locus name is given, following the standard nomenclature proposed for endogenous  
7 retrovirus (ERV) loci (57), using the classifier 'ChPV'. Asterisks indicate contigs that were truncated  
8 within the virus-derived portion of the sequence.

9

1 **Figure Legends**

2

3 **Figure 1.** Basic gene content of novel chapparvoviruses and chapparvovirus  
4 EPV, shown in relation to a representative chapparvovirus genome (mouse  
5 kidney parvovirus). Asterisks indicate contigs that were truncated within the  
6 virus-derived portion of the sequence. Abbreviations: non-structural protein  
7 (NS); capsid protein (VP); nucleoprotein (NP).

8

9 **Fig.2 legend:** Genome organization, position of open reading frames (ORFs)  
10 and predicted cis transcription elements of chapparvoviruses and endogenous  
11 chapparvoviral elements shown in six reading frames. ORFs are represented  
12 by arrows, colored according to homology. In-frame stop codons are shown  
13 as vertical lines. Splice donor sites are marked by white-colored, acceptor  
14 sites by orange-colored bars. Blue colored bars show predicted  
15 polyadenylation signals. Promoters are presented as small green arrows if  
16 predicted with a higher score than 0.95 of 1 and pink if the score is between  
17 0.9 and 0.95. Sequences marked by grey boxes are assessed to be  
18 transcribed but not translated. (A) Near complete entries detected include the  
19 exogenous, potentially circulating chapparvovirus of the gulf pipefish  
20 (*Syngnathus scovelli*) as well as two, non-identical, endogenous  
21 chaparvoviruses of the Western black widow spider (*Latrodectus hesperus*).  
22 ChPV.2-*Latrodectus hesperus* contains a previously unidentified repetitive  
23 element, present as multiple copies scattered in the *Latrodectus* genome,  
24 marked by the white box within the VP gene. The element ChPV.10-  
25 *Onthophagus taurus* shares its integration site with another endogenous  
26 element disclosing similarity to ambidensovirus. (B) Representatives of the  
27 three basic genome organization types of exogenous amniote  
28 chapparvoviruses. ORF4, however, does not occur in any of the other avian  
29 chapparvoviruses.

30

31 **Figure 3 legend:** (A) Maximum likelihood phylogeny of the family  
32 *Parvoviridae* based on the tripartite helicase domain of the large non-  
33 structural protein NS1. (B) Maximum likelihood phylogenetic reconstructions  
34 of the Chapparvovirus clade based on the complete aligned amino acid

1 sequences of the NS1. The presence or suspected presence (marked by a  
2 question mark) of predicted auxiliary protein encoding open reading frames  
3 (ORFs) are mapped as boxes of various colors next to each entry. Bold taxa  
4 labels indicate endogenous sequences, whereas taxa labels in italics indicate  
5 sequences known or believed to derive from viruses.

6

#### 7 **Figure 4**

8 (A) Comparison of VP monomer ribbon diagrams of the protoparvovirus  
9 minute virus of mice (PDB ID: 1Z14) from subfamily *Parvovirinae* to homology  
10 models of an amniote, a fish and an endogenous arthropod chapparvovirus.  
11 Variable regions (VRs) of the same number are marked by the same color  
12 and mapped to the surface and luminal area of the icosahedral capsid model  
13 constructed of 60 monomers. In case of minute virus of mice, the VRs are  
14 marked by both the traditional numbering established for  
15 dependoparvoviruses (Latin numerals) and by the special one applied for  
16 protoparvoviruses only (Arabic numerals). Triangles mark the position of an  
17 asymmetric unit within the capsid, the fivefold symmetry axis marked by a  
18 pentagon, the threefolds with triangles and the twofold with an ellipsoid. (B)  
19 Homology model of ORF6, the hypothetical structural protein of *Syngnathus*  
20 *scovelli* chapparvovirus (ScChPV). The trimer of the ScChPV monomer model  
21 reveals a gap at each subunit interaction (arrows), unlike in case of the trimer  
22 of the hitherto smallest parvoviral capsid protein, *Penaeus stylirostris*  
23 densovirus. The gap might accommodate ORF6 in the assembled ScChPV  
24 capsid. Symmetry axes marked by the same symbols as for panel A.

25

#### 26 **Figure 5**

27 (A) The three different predicted chapparvovirus VP structural types  
28 represented by ribbon diagrams. The first panel shows sSuperposition of  
29 protein monomer homology models of amniote chapparvovirus capsids,  
30 including reptilian, avian, rodent, chiropteran and ungulate representatives.  
31 Black arrows show variable regions (VRs) The next two panels show the  
32 homology model of a fish chapparvovirus capsid monomer and an arthropod  
33 endogenous chapparvoviral one. (B) Capsid surface morphology of amniote

1 chapparvovirus homology models compared to that obtained for a prototypic  
2 parvovirus, minute virus of mice (MVM) (PDB ID: 1Z14 at 3.25 Å resolution).  
3 Capsids are orientated by their twofold symmetry axes, as shown in the line  
4 diagram. Below the comparison of homology models of complete viral capsid  
5 surface morphology of the newly-identified fish chapparvovirus and arachnid  
6 endogenous chapparvoviral element is shown with that of the actual capsid  
7 structure of two densoviruses (subfamily *Densovirinae*, genus  
8 *Ambidensovirus*) (PDB ID: 4MGU at 3.5 Å resolution for *Acheta domestica*  
9 ambidensovirus and 1DNU at 3.7 Å for *Galleria mellonella* ambidensovirus).

## 1 Acknowledgements

2 RJG was funded by the Medical Research Council of the United Kingdom  
3 (MC\_UU\_12014/12). WMS is supported by the Fundação de Amparo à  
4 Pesquisa do Estado de São Paulo, Brazil (Scholarships No. 17/13981-0).  
5 MAM and JP are funded by NIH R01 GM109524.

6

## 7 References

8

9

- 10 1. **Cotmore SF, Agbandje-McKenna M, Chiorini JA, Mukha DV, Pintel DJ,**  
11 **Qiu J, Soderlund-Venermo M, Tattersall P, Tijssen P, Gatherer D,**  
12 **Davison AJ.** 2014. The family Parvoviridae. *Arch Virol* **159**:1239-1247.
- 13 2. **Tijssen P, Agbandje-McKenna M, Almendral JM, Bergoin M, Flegel TW,**  
14 **Hedman K, Kleinschmidt J, Li Y, Pintel DJ, Tattersall P.** 2011. Family  
15 Parvoviridae, p 405–425. *In* King AMQ, Adams MJ, Carstens EB, Lefkowitz  
16 EJ (ed), *Virus taxonomy—Ninth Report of the International Committee on*  
17 *Taxonomy of Viruses.* Elsevier/Academic Press, London.
- 18 3. **Zadori Z, Szelei J, Tijssen P.** 2005. SAT: a late NS protein of porcine  
19 parvovirus. *J Virol* **79**:13129-13138.
- 20 4. **Sonntag F, Kother K, Schmidt K, Weghofer M, Raupp C, Nieto K, Kuck A,**  
21 **Gerlach B, Bottcher B, Muller OJ, Lux K, Horer M, Kleinschmidt JA.**  
22 2011. The assembly-activating protein promotes capsid assembly of different  
23 adeno-associated virus serotypes. *J Virol* **85**:12686-12697.
- 24 5. **Siqueira JD, Ng TF, Miller M, Li L, Deng X, Dodd E, Batac F, Delwart E.**  
25 2017. ENDEMIC INFECTION OF STRANDED SOUTHERN SEA OTTERS  
26 (ENHYDRA LUTRIS NEREIS) WITH NOVEL PARVOVIRUS,  
27 POLYOMAVIRUS, AND ADENOVIRUS. *J Wildl Dis* **53**:532-542.
- 28 6. **Vaisanen E, Fu Y, Hedman K, Soderlund-Venermo M.** 2017. Human  
29 Protoparvoviruses. *Viruses* **9**.
- 30 7. **Geoghegan JL, Pirotta V, Harvey E, Smith A, Buchmann JP, Ostrowski**  
31 **M, Eden JS, Harcourt R, Holmes EC.** 2018. Virological Sampling of  
32 Inaccessible Wildlife with Drones. *Viruses* **10**.
- 33 8. **de Souza WM, Dennis T, Fumagalli MJ, Araujo J, Sabino-Santos G, Maia**  
34 **FGM, Acrani GO, Carrasco AOT, Romeiro MF, Modha S, Vieira LC,**  
35 **Ometto T, Queiroz LH, Durigon EL, Nunes MRT, Figueiredo LTM, Gifford**  
36 **RJ.** 2018. Novel Parvoviruses from Wild and Domestic Animals in Brazil  
37 Provide New Insights into Parvovirus Distribution and Diversity. *Viruses* **10**.
- 38 9. **de Souza WM, Romeiro MF, Fumagalli MJ, Modha S, de Araujo J,**  
39 **Queiroz LH, Durigon EL, Figueiredo LT, Murcia PR, Gifford RJ.** 2017.  
40 Chapparvoviruses occur in at least three vertebrate classes and have a broad  
41 biogeographic distribution. *J Gen Virol* **98**:225-229.
- 42 10. **Phan TG, Gulland F, Simeone C, Deng X, Delwart E.** 2015. Sesavirus:  
43 prototype of a new parvovirus genus in feces of a sea lion. *Virus Genes*  
44 **50**:134-136.
- 45 11. **Phan TG, Dreno B, da Costa AC, Li L, Orlandi P, Deng X, Kapusinszky B,**  
46 **Siqueira J, Knol AC, Halary F, Dantal J, Alexander KA, Pesavento PA,**  
47 **Delwart E.** 2016. A new protoparvovirus in human fecal samples and  
48 cutaneous T cell lymphomas (mycosis fungoides). *Virology* **496**:299-305.
- 49 12. **Belyi VA, Levine AJ, Skalka AM.** 2010. Sequences from ancestral single-  
50 stranded DNA viruses in vertebrate genomes: the parvoviridae and  
51 circoviridae are more than 40 to 50 million years old. *J Virol* **84**:12458-12462.
- 52 13. **Katzourakis A, Gifford RJ.** 2010. Endogenous viral elements in animal  
53 genomes. *PLoS Genet* **6**:e1001191.

- 1 14. **Liu H, Fu Y, Xie J, Cheng J, Ghabrial SA, Li G, Peng Y, Yi X, Jiang D.** 2011. Widespread endogenization of densoviruses and parvoviruses in  
2 animal and human genomes. *J Virol* **85**:9863-9876.
- 3 15. **Reuter G, Boros A, Delwart E, Pankovics P.** 2014. Novel circular single-  
4 stranded DNA virus from turkey faeces. *Arch Virol* **159**:2161-2164.
- 5 16. **Yang S, Liu Z, Wang Y, Li W, Fu X, Lin Y, Shen Q, Wang X, Wang H,**  
6 **Zhang W.** 2016. A novel rodent Chapparvovirus in feces of wild rats. *Viol J*  
7 **13**:133.
- 8 17. **Kapoor A, Simmonds P, Lipkin WI.** 2010. Discovery and characterization of  
9 mammalian endogenous parvoviruses. *J Virol* **84**:12628-12635.
- 10 18. **Holmes EC.** 2011. The evolution of endogenous viral elements. *Cell Host*  
11 *Microbe* **10**:368-377.
- 12 19. **Baker KS, Leggett RM, Bexfield NH, Alston M, Daly G, Todd S,**  
13 **Tachedjian M, Holmes CE, Crameri S, Wang LF, Heeney JL, Suu-Ire R,**  
14 **Kellam P, Cunningham AA, Wood JL, Caccamo M, Murcia PR.** 2013.  
15 Metagenomic study of the viruses of African straw-coloured fruit bats:  
16 detection of a chiropteran poxvirus and isolation of a novel adenovirus.  
17 *Virology* **441**:95-106.
- 18 20. **Palinski RM, Mitra N, Hause BM.** 2016. Discovery of a novel Parvovirinae  
19 virus, porcine parvovirus 7, by metagenomic sequencing of porcine rectal  
20 swabs. *Virus Genes* **52**:564-567.
- 21 21. **Roediger B, Lee Q, Tikoo S, Cobbin JCA, Henderson JM, Jormakka M,**  
22 **O'Rourke MB, Padula MP, Pinello N, Henry M, Wynne M, Santagostino**  
23 **SF, Brayton CF, Rasmussen L, Lisowski L, Tay SS, Harris DC, Bertram**  
24 **JF, Dowling JP, Bertolino P, Lai JH, Wu W, Bachovchin WW, Wong JJ,**  
25 **Gorrell MD, Shaban B, Holmes EC, Jolly CJ, Monette S, Weninger W.**  
26 2018. An Atypical Parvovirus Drives Chronic Tubulointerstitial Nephropathy  
27 and Kidney Fibrosis. *Cell* **175**:530-543.e524.
- 28 22. **Schoonvaere K, Smaghe G, Francis F, de Graaf DC.** 2018. Study of the  
29 Metatranscriptome of Eight Social and Solitary Wild Bee Species Reveals  
30 Novel Viruses and Bee Parasites. *Front Microbiol* **9**:177.
- 31 23. **Chapman MS, Agbandje-McKenna M.** 2006. Atomic structure of viral  
32 particles, p 107–123. *In* Kerr JR, Cotmore SF, Bloom ME, Linden RM, Parrish  
33 CR (ed), *Parvoviruses*. Hodder Arnold, Ltd;.
- 34 24. **Kailasan S, Agbandje-McKenna M, Parrish CR.** 2015. Parvovirus Family  
35 Conundrum: What Makes a Killer? *Annu Rev Virol* **2**:425-450.
- 36 25. **Penzes JJ, Marsile-Medun S, Agbandje-McKenna M, Gifford RJ.** 2018.  
37 Endogenous amdoparvovirus-related elements reveal insights into the biology  
38 and evolution of vertebrate parvoviruses. *Virus Evol* **4**:vey026.
- 39 26. **Arriagada G, Gifford RJ.** 2014. Parvovirus-derived endogenous viral  
40 elements in two South American rodent genomes. *J Virol* **88**:12158-12162.
- 41 27. **Deyle DR, Russell DW.** 2009. Adeno-associated virus vector integration.  
42 *Curr Opin Mol Ther* **11**:442-447.
- 43 28. **Majumder K, Etingov I, Pintel DJ.** 2017. Protoparvovirus Interactions with  
44 the Cellular DNA Damage Response. *Viruses* **9**.
- 45 29. **Willmann R.** 2004. Phylogenetic relationships and evolution of insects., p  
46 330–344. *In* Cracraft J, Donoghue MJ (ed), *Assembling the Tree of Life*.  
47 Oxford University Press.
- 48 30. **Cohen S, Pante N.** 2005. Pushing the envelope: microinjection of Minute  
49 virus of mice into *Xenopus* oocytes causes damage to the nuclear envelope.  
50 *J Gen Virol* **86**:3243-3252.
- 51 31. **Sonntag F, Bleker S, Leuchs B, Fischer R, Kleinschmidt JA.** 2006.  
52 Adeno-associated virus type 2 capsids with externalized VP1/VP2 trafficking  
53



- 1 domains are generated prior to passage through the cytoplasm and are  
2 maintained until uncoating occurs in the nucleus. *J Virol* **80**:11040-11054.
- 3 32. **Kailasan S, Halder S, Gurda B, Bladek H, Chipman PR, McKenna R,**  
4 **Brown K, Agbandje-McKenna M.** 2015. Structure of an enteric pathogen,  
5 bovine parvovirus. *J Virol* **89**:2603-2614.
- 6 33. **Kaufmann B, El-Far M, Plevka P, Bowman VD, Li Y, Tijssen P, Rossmann**  
7 **MG.** 2011. Structure of Bombyx mori densovirus 1, a silkworm pathogen. *J*  
8 *Virol* **85**:4691-4697.
- 9 34. **Williams SH, Che X, Garcia JA, Klena JD, Lee B, Muller D, Ulrich W,**  
10 **Corrigan RM, Nichol S, Jain K, Lipkin WI.** 2018. Viral Diversity of House  
11 Mice in New York City. *MBio* **9**.
- 12 35. **Drouin LM, Lins B, Janssen M, Bennett A, Chipman P, McKenna R, Chen**  
13 **W, Muzyczka N, Cardone G, Baker TS, Agbandje-McKenna M.** 2016.  
14 Cryo-electron Microscopy Reconstruction and Stability Studies of the Wild  
15 Type and the R432A Variant of Adeno-associated Virus Type 2 Reveal that  
16 Capsid Structural Stability Is a Major Factor in Genome Packaging. *J Virol*  
17 **90**:8542-8551.
- 18 36. **Simpson AA, Hebert B, Sullivan GM, Parrish CR, Zadori Z, Tijssen P,**  
19 **Rossmann MG.** 2002. The structure of porcine parvovirus: comparison with  
20 related viruses. *J Mol Biol* **315**:1189-1198.
- 21 37. **Xie Q, Bu W, Bhatia S, Hare J, Somasundaram T, Azzi A, Chapman MS.**  
22 2002. The atomic structure of adeno-associated virus (AAV-2), a vector for  
23 human gene therapy. *Proc Natl Acad Sci U S A* **99**:10405-10410.
- 24 38. **Simpson AA, Chipman PR, Baker TS, Tijssen P, Rossmann MG.** 1998.  
25 The structure of an insect parvovirus (*Galleria mellonella* densovirus) at 3.7 Å  
26 resolution. *Structure* **6**:1355-1367.
- 27 39. **Kaufmann B, Bowman VD, Li Y, Szelei J, Waddell PJ, Tijssen P,**  
28 **Rossmann MG.** 2010. Structure of *Penaeus stylirostris* densovirus, a shrimp  
29 pathogen. *J Virol* **84**:11289-11296.
- 30 40. **Zhu H, Dennis T, Hughes J, Gifford RJ.** 2018. Database-integrated genome  
31 screening (DIGS): exploring genomes heuristically using sequence similarity  
32 search tools and a relational database. bioRxiv doi:10.1101/246835.
- 33 41. **Carver T, Harris SR, Berriman M, Parkhill J, McQuillan JA.** 2012. Artemis:  
34 an integrated platform for visualization and analysis of high-throughput  
35 sequence-based experimental data. *Bioinformatics* **28**:464-469.
- 36 42. **Knudsen S.** 1999. Promoter2.0: for the recognition of PolIII promoter  
37 sequences. *Bioinformatics* **15**:356-361.
- 38 43. **Reese MG, Eeckman FH, Kulp D, Haussler D.** 1997. Improved splice site  
39 detection in Genie. *J Comput Biol* **4**:311-323.
- 40 44. **Dogan RI, Getoor L, Fau - Wilbur WJ, Wilbur Wj Fau - Mount SM, Mount**  
41 **SM.** SplicePort--an interactive splice-site analysis tool.
- 42 45. **Salamov AA, Solovyev VV.** 1997. Recognition of 3' -processing sites of  
43 human mRNA precursors. *Bioinformatics* **13**:23-28.
- 44 46. **Armougom F, Moretti S, Poirot O, Audic S, Dumas P, Schaeli B, Keduas**  
45 **V, Notredame C.** 2006. Espresso: automatic incorporation of structural  
46 information in multiple sequence alignments using 3D-Coffee. *Nucleic Acids*  
47 *Res* **34**:W604-608.
- 48 47. **Edgar RC.** 2004. MUSCLE: multiple sequence alignment with high accuracy  
49 and high throughput. *Nucleic Acids Res* **32**:1792-1797.
- 50 48. **Wallace IM, O'Sullivan O, Higgins DG, Notredame C.** 2006. M-Coffee:  
51 combining multiple sequence alignment methods with T-Coffee. *Nucleic Acids*  
52 *Res* **34**:1692-1699.

- 1 49. **Guindon S, Dufayard JF, Lefort V, Anisimova M, Hordijk W, Gascuel O.**  
2 2010. New algorithms and methods to estimate maximum-likelihood  
3 phylogenies: assessing the performance of PhyML 3.0. *Syst Biol* **59**:307-321.  
4 50. **Felsenstein J.** 2005. PHYLIP (Phylogeny Inference Package) version 3.6. ,  
5 Department of Genome Sciences, University of Washington, Seattle.  
6 51. **Lobley A, Sadowski MI, Jones DT.** 2009. pGenTHREADER and  
7 pDomTHREADER: new methods for improved protein fold recognition and  
8 superfamily discrimination. *Bioinformatics* **25**:1761-1767.  
9 52. **Yang J, Yan R, Roy A, Xu D, Poisson J, Zhang Y.** 2015. The I-TASSER  
10 Suite: protein structure and function prediction. *Nat Methods* **12**:7-8.  
11 53. **Carrillo-Tripp M, Shepherd CM, Borelli IA, Venkataraman S, Lander G,**  
12 **Natarajan P, Johnson JE, Brooks CL, 3rd, Reddy VS.** 2009. VIPERdb2: an  
13 enhanced and web API enabled relational database for structural virology.  
14 *Nucleic Acids Res* **37**:D436-442.  
15 54. **Schrödinger L.** The PyMOL Molecular Graphics System, Version 2.0.  
16 55. **Pettersen EF, Goddard TD, Huang CC, Couch GS, Greenblatt DM, Meng**  
17 **EC, Ferrin TE.** 2004. UCSF Chimera--a visualization system for exploratory  
18 research and analysis. *J Comput Chem* **25**:1605-1612.  
19 56. **Zuker M.** 2003. Mfold web server for nucleic acid folding and hybridization  
20 prediction. *Nucleic Acids Res* **31**:3406-3415.  
21 57. **Gifford RJ, Blomberg J, Coffin JM, Fan H, Heidmann T, Mayer J, Stoye J,**  
22 **Tristem M, Johnson WE.** 2018. Nomenclature for endogenous retrovirus  
23 (ERV) loci. *Retrovirology* **15**:59.  
24  
25

1 **Supporting Information Legends**

2

3 **Figure S1**

4 Secondary structure predictions of the *Syngnathus scovelli* chapparovirus  
5 genome termini.

6

7 **Figure S2**

8 (A) Secondary structure and disordered region predictions of the  
9 nucleoprotein (NP) ORF from an amniote chapparovirus (mouse kidney  
10 virus) and an endogenous chapparoviral element from an invertebrate  
11 genome (ChPV.3-Latrodectus hesperus). (B) Predictions of potential  
12 phosphorylation sites in case of the same amniote chapparovirus and an  
13 invertebrate endogenous chapparoviral element NPs.

14

15 **Figure S3**

16 (A) Alignment of amniote chapparovirus capsid protein ORF (VP) derived  
17 amino acid sequences, containing both isolates of murine origin. Variable  
18 regions (VRs) are marked by the black bars and coloring is based on  
19 sequence similarity (red = highly similar, blue = not similar). The conserved  
20 loops making up the fivefold symmetry axes of the capsid are highlighted in  
21 bold. (B) The same alignment incorporating the complete VP protein  
22 sequences of all novel chapparovirus sequences reported in this study.

23

24

## Figure Legends

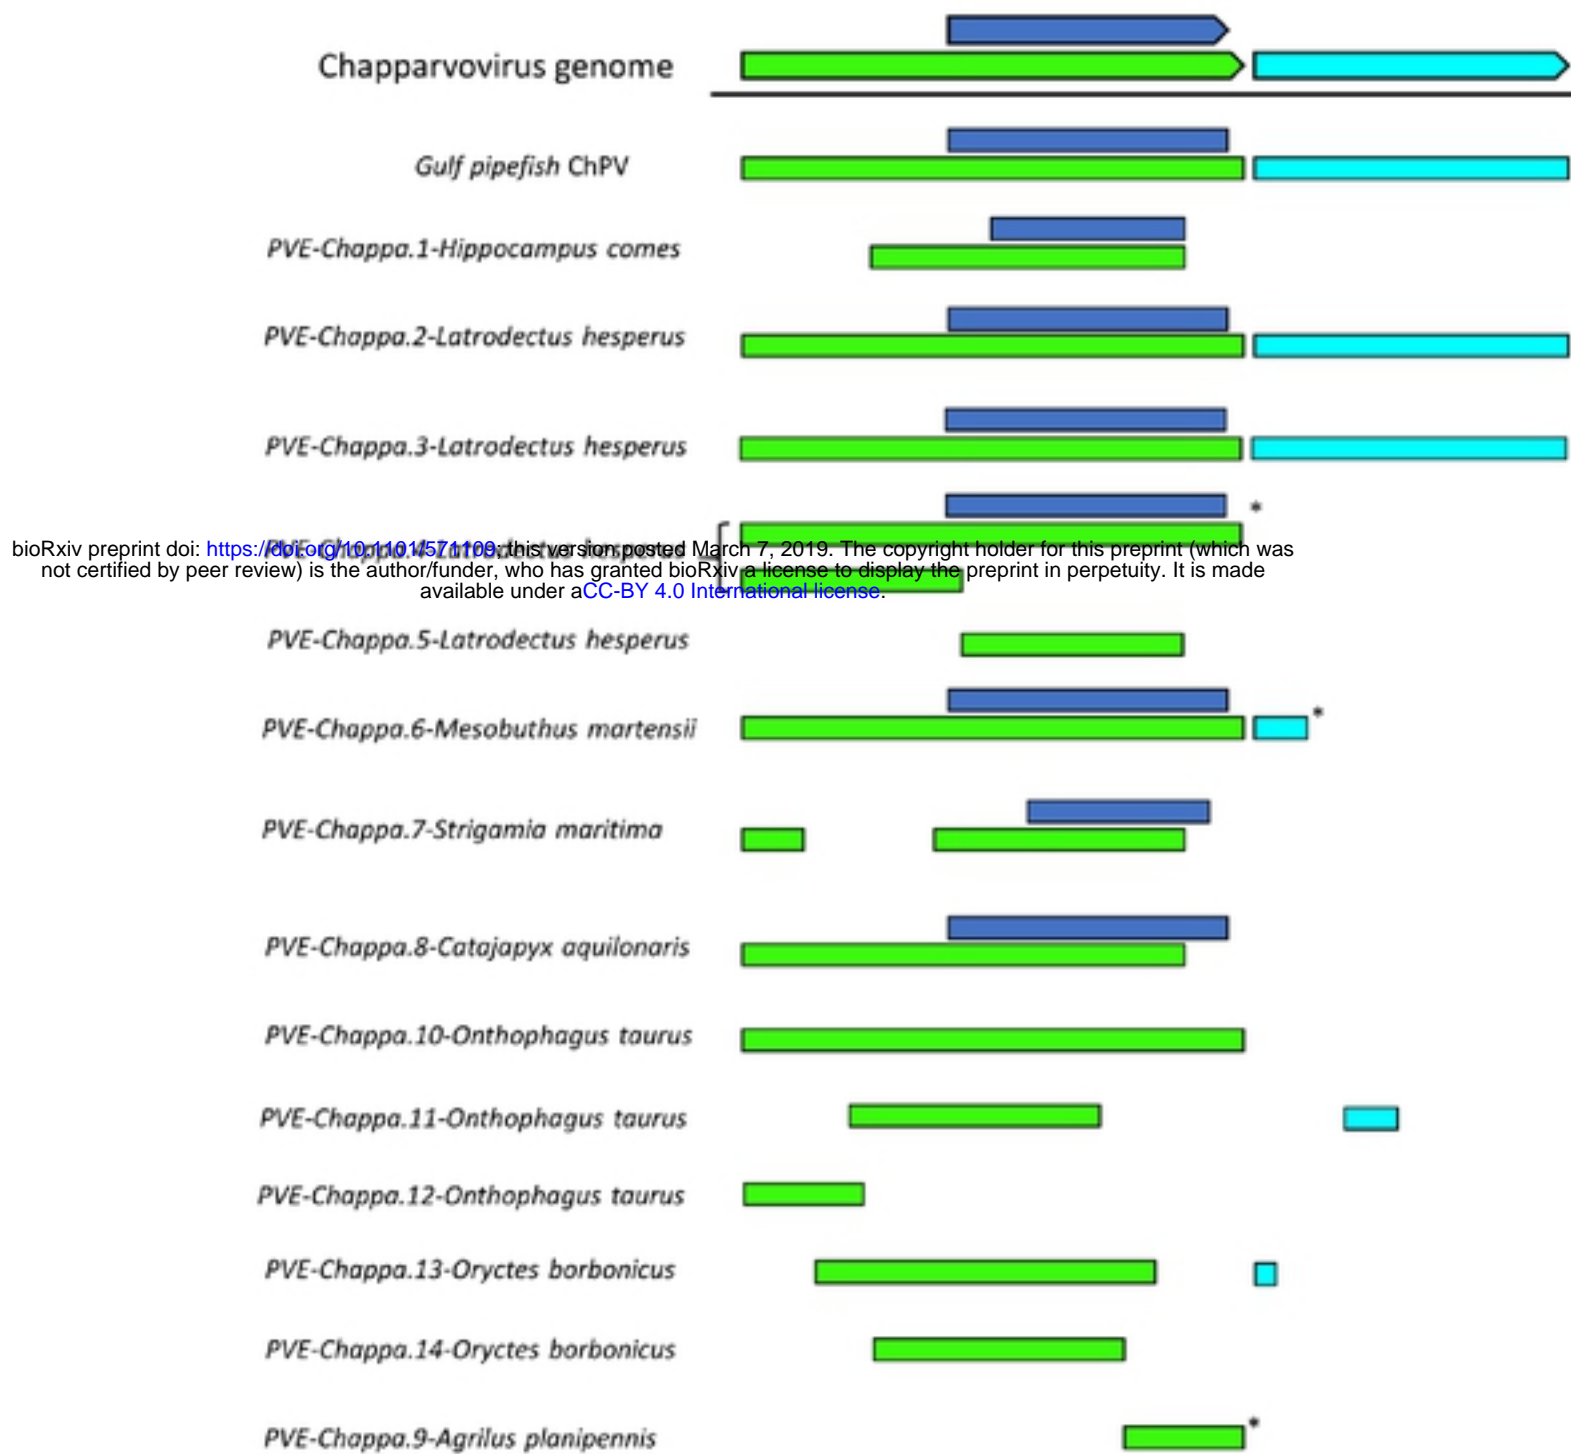

**Figure 1.** Basic gene content of novel chapparvoviruses and chapparvovirus EPV, shown in relation to a representative chapparvovirus genome (mouse kidney parvovirus). Abbreviations: non-structural protein (NS); capsid protein (VP); nucleoprotein (NP).

**Figure 2a**

**Vertebrates**

Gulf pipefish (*Syngnathus scovelli*) chapparvovirus (exogenous)

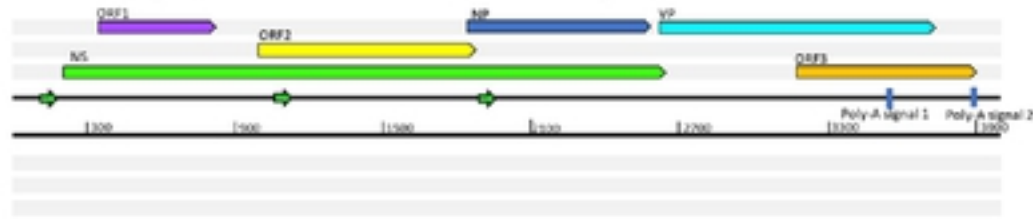

**Invertebrates**

ChPV.2-*Latrodectus hesperus*

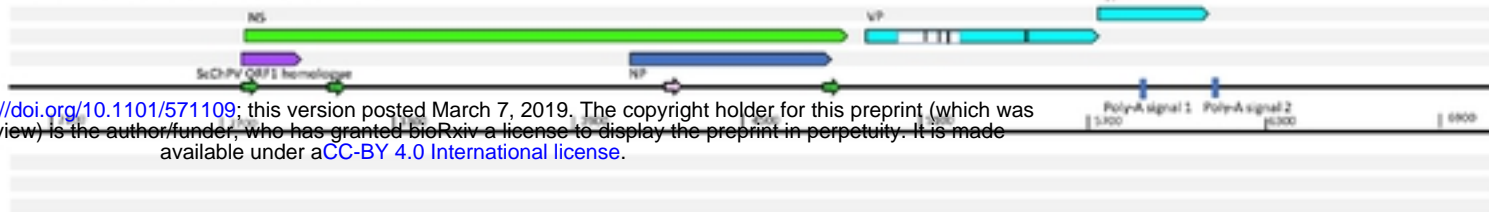

bioRxiv preprint doi: <https://doi.org/10.1101/571109>; this version posted March 7, 2019. The copyright holder for this preprint (which was not certified by peer review) is the author/funder, who has granted bioRxiv a license to display the preprint in perpetuity. It is made available under aCC-BY 4.0 International license.

ChPV.3-*Latrodectus hesperus*

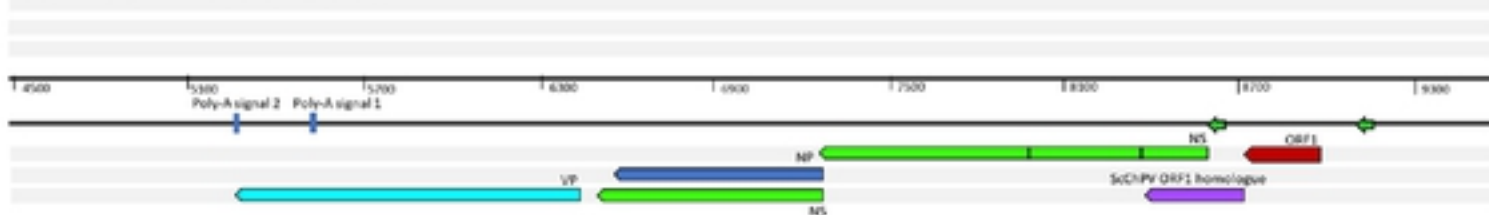

Taurus scarab (*Onthophagus taurus*) ambidensoviral PVE and ChPV.10-*Onthophagus taurus*

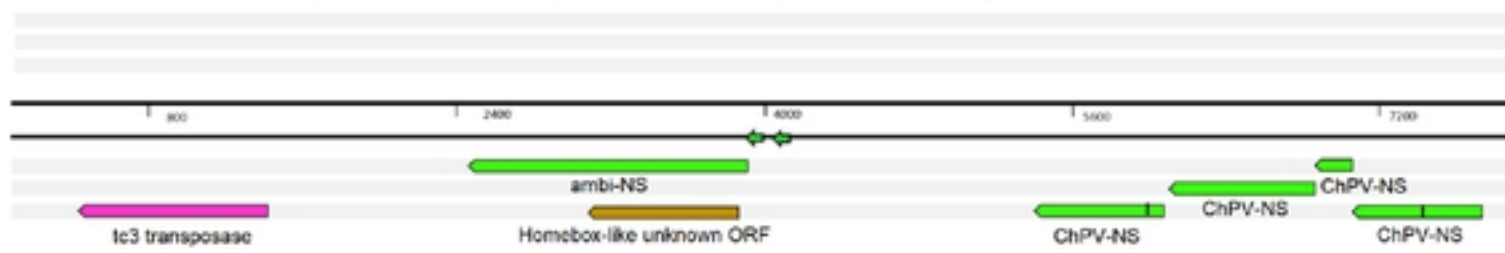

**Figure 2b**

### Simian parvo-like virus 3

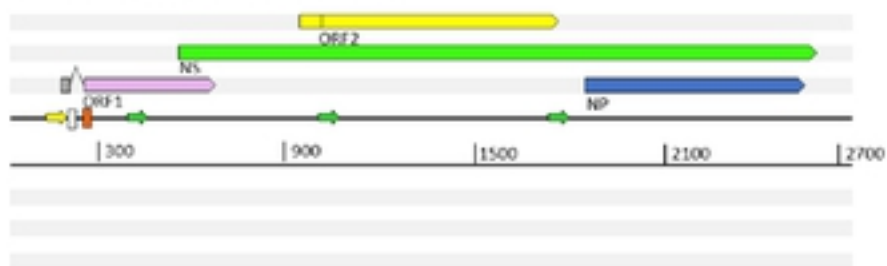

### Porcine parvovirus 7

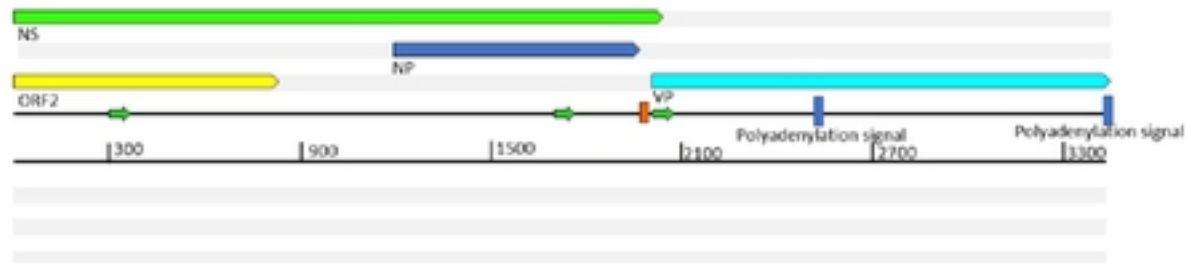

Type 1

bioRxiv preprint doi: <https://doi.org/10.1101/571109>; this version posted March 7, 2019. The copyright holder for this preprint (which was not certified by peer review) is the author/funder, who has granted bioRxiv a license to display the preprint in perpetuity. It is made available under aCC-BY 4.0 International license.

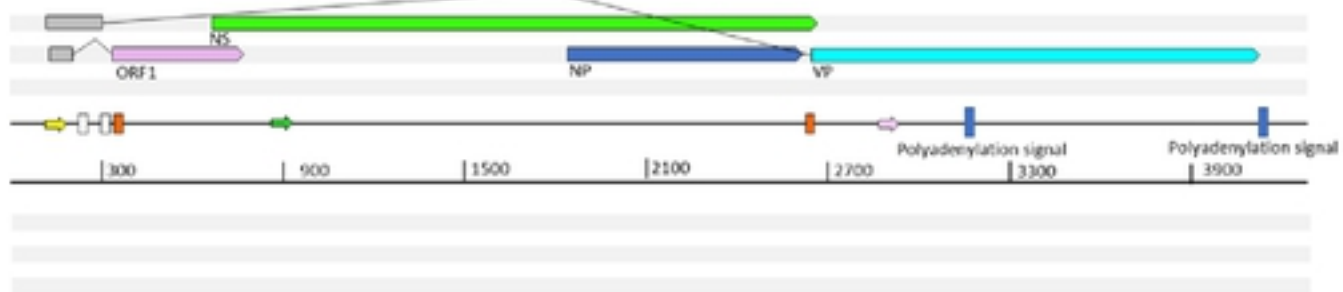

Type 2

### Turkey parvovirus 2

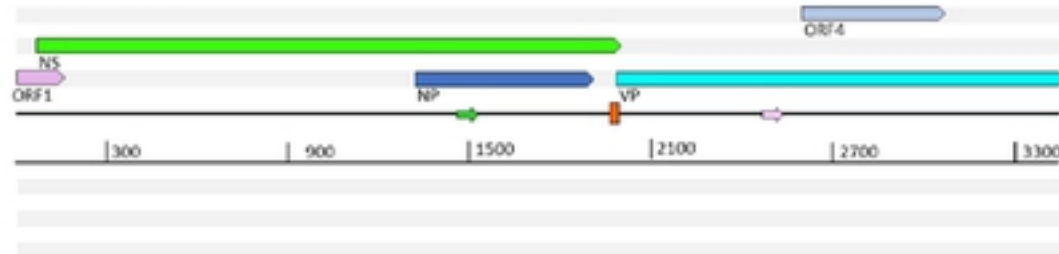

Type 3



**Fig.2 legend:** Genome organization, position of open reading frames (ORFs) and predicted cis transcription elements of chapparvoviruses and endogenous chapparvoviral elements shown in six reading frames. ORFs are represented by arrows, colored according to homology. In-frame stop codons are shown as vertical lines. Splice donor sites are marked by white-colored, acceptor sites by orange-colored bars. Blue colored bars show predicted polyadenylation signals. Promoters are presented as small green arrows if predicted with a higher score than 0.95 of 1 and pink if the score is between 0.9 and 0.95. Sequences marked by grey boxes are assessed to be transcribed but not translated. (A) Near complete entries detected include the exogenous, potentially circulating chapparvovirus of the gulf pipefish (*Syngnathus scovelli*) as well as two, non-identical, endogenous chapparvoviruses of the Western black widow spider (*Latrodectus hesperus*). ChPV.2-*Latrodectus hesperus* contains a previously unidentified repetitive element, present as multiple copies scattered in the *Latrodectus* genome, marked by the white box within the VP gene. The element ChPV.10-*Onthophagus taurus* shares its integration site with another endogenous element disclosing similarity to ambidensoviruses. (B) Representatives of the three basic genome organization types of exogenous amniote chapparvoviruses. ORF4, however, does not occur in any of the other avian chapparvoviruses.



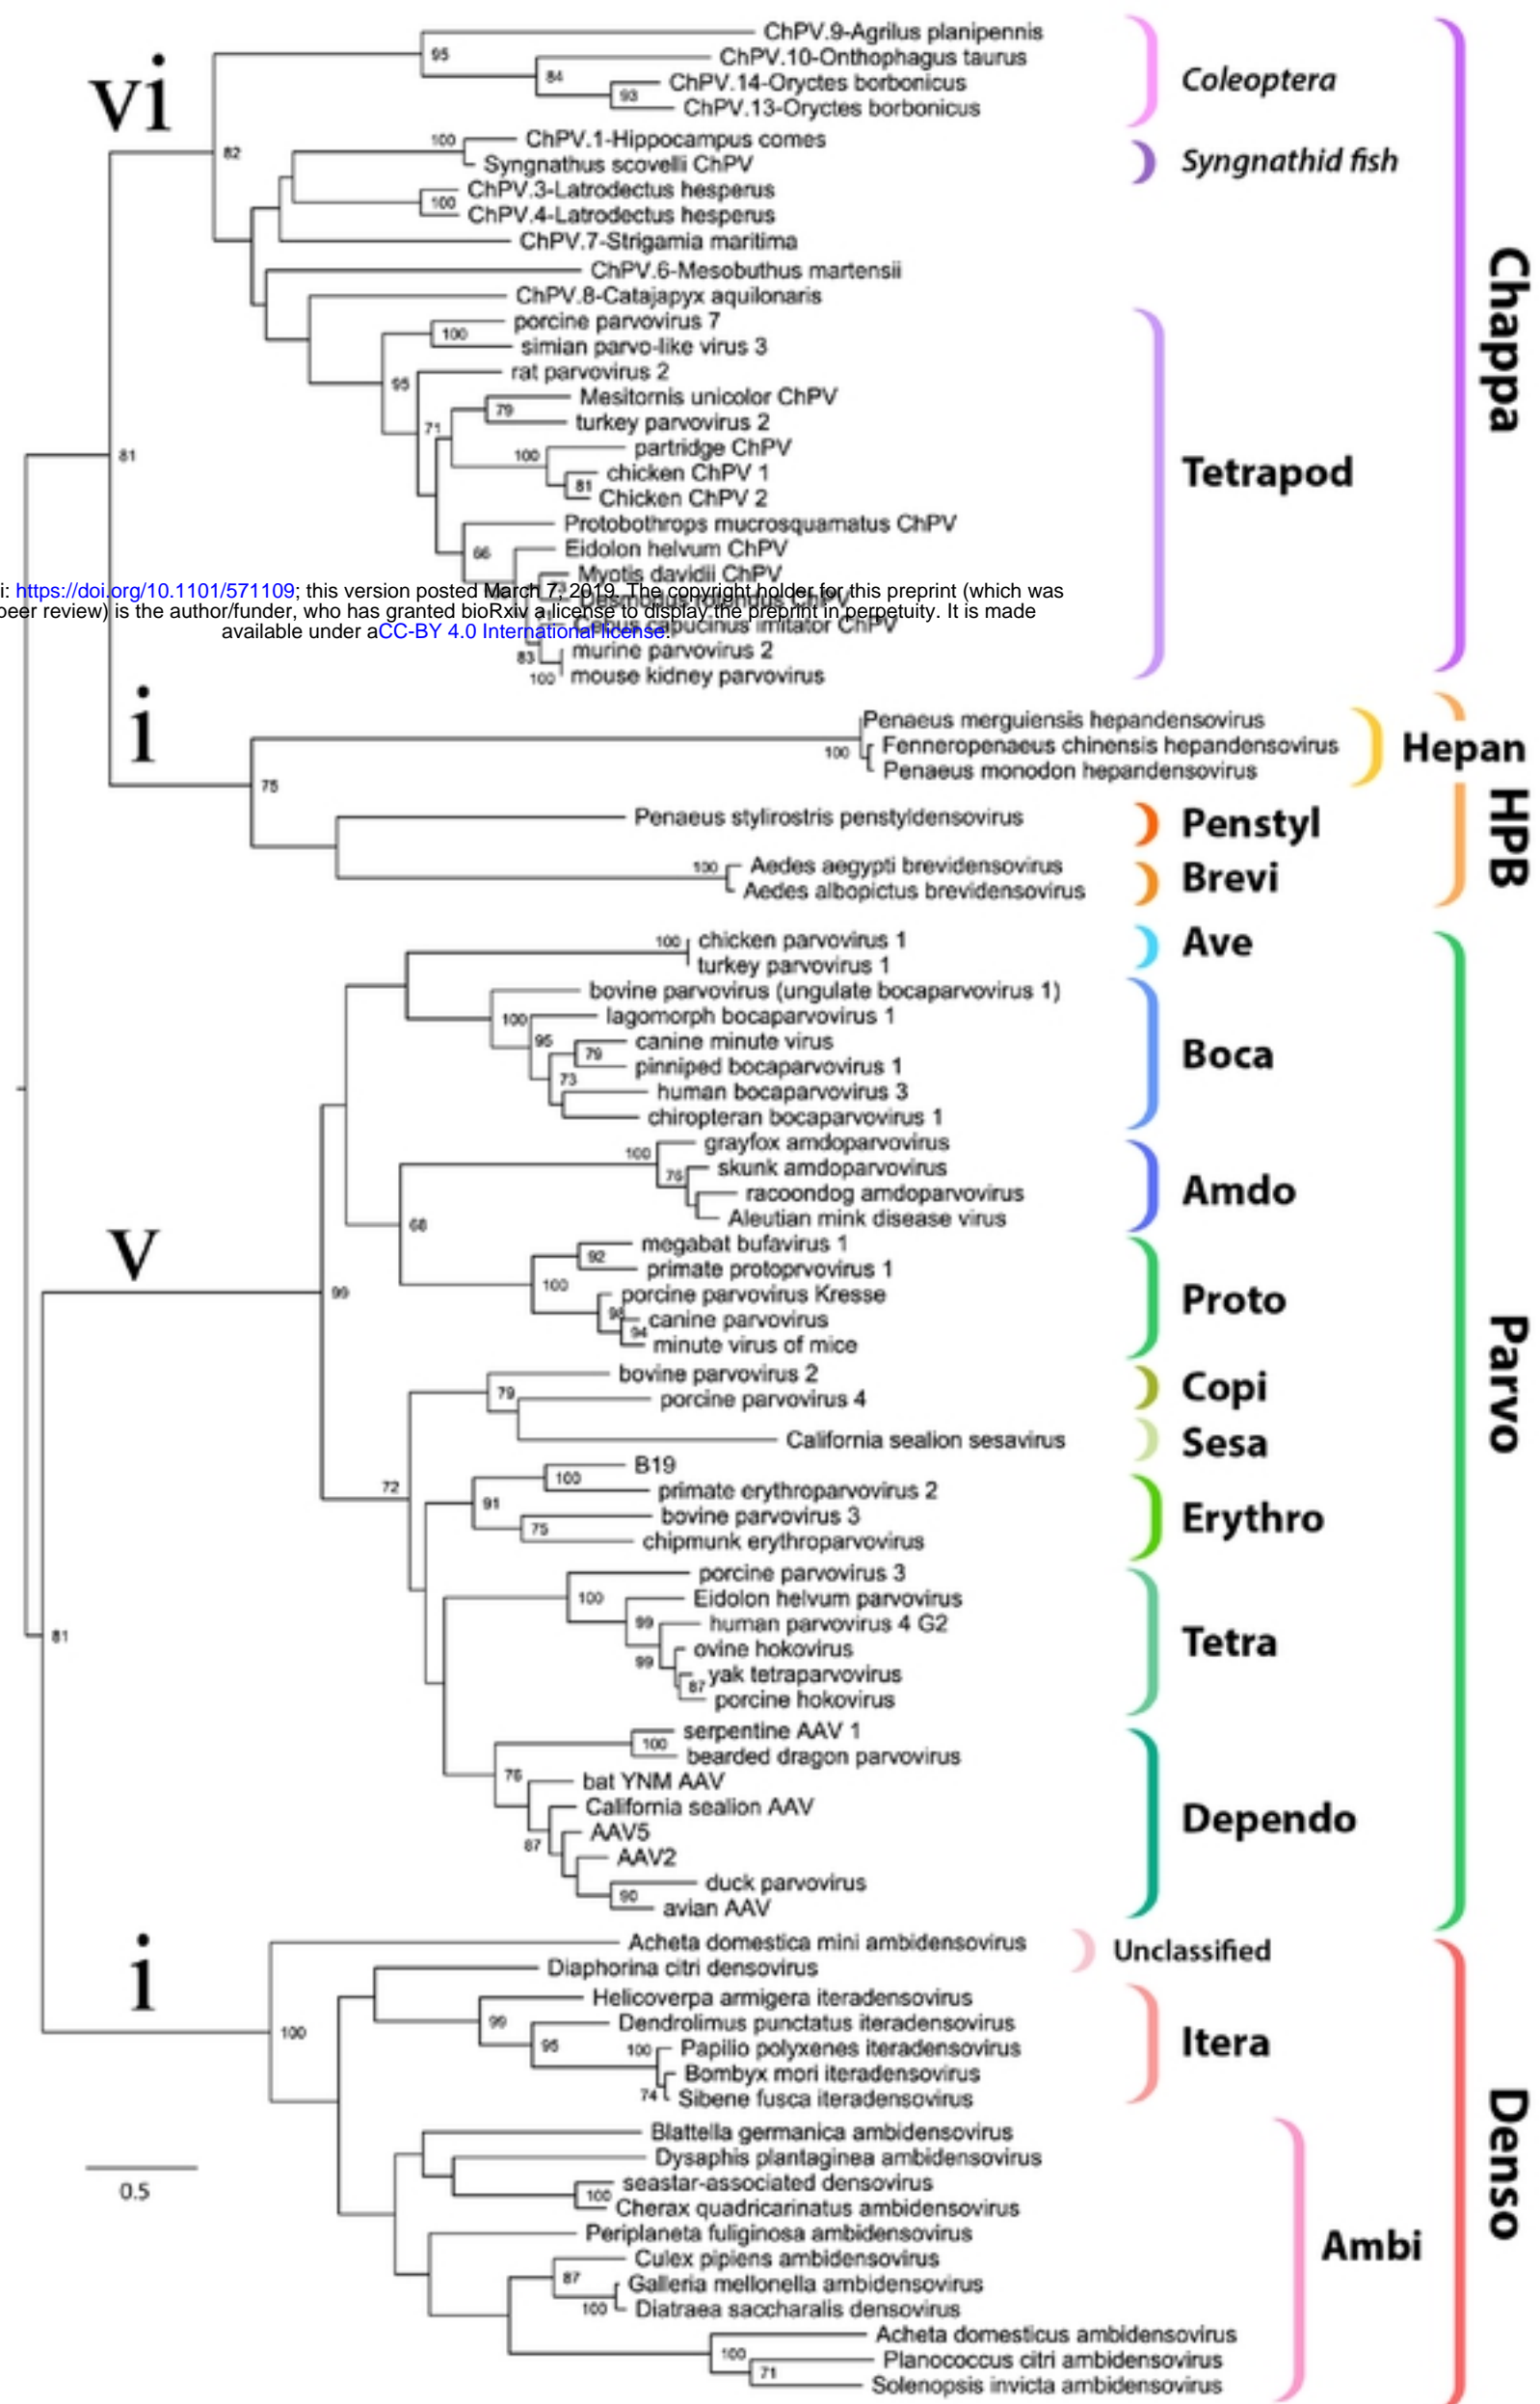

bioRxiv preprint doi: <https://doi.org/10.1101/571109>; this version posted March 7, 2019. The copyright holder for this preprint (which was not certified by peer review) is the author/funder, who has granted bioRxiv a license to display the preprint in perpetuity. It is made available under aCC-BY 4.0 International license.

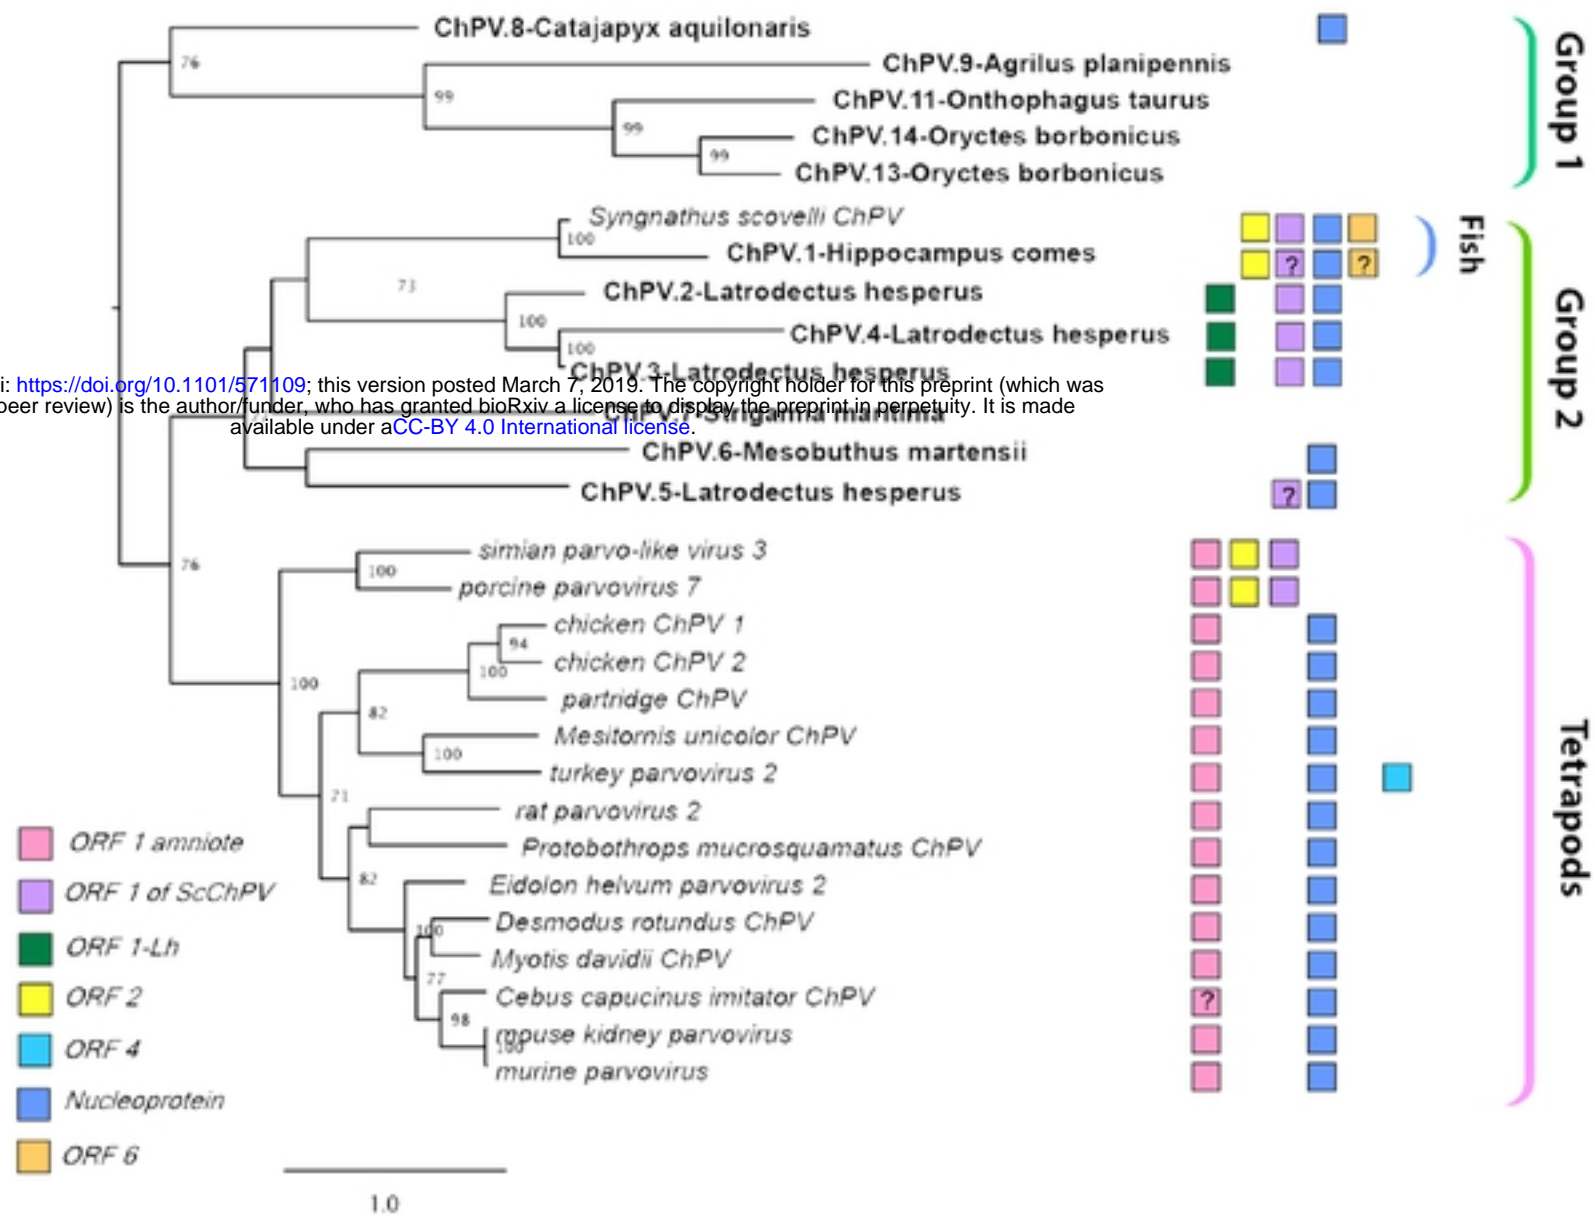

**Figure 3b**

**Figure 3 legend:** (A) Maximum likelihood phylogeny of the family *Parvoviridae* based on the tripartite helicase domain of the large non-structural protein NS1. (B) Maximum likelihood phylogenetic reconstructions of the Chapparvovirus clade based on the complete aligned amino acid sequences of the NS1. The presence or suspected presence (marked by a question mark) of predicted auxiliary protein encoding open reading frames (ORFs) are mapped as boxes of various colors next to each entry. Sequences of vertebrate origin are indicated by black, from members of the arthropod subphyla Chelicerata by blue, Myriapoda by purple and Hexapoda by green text. Bold taxa labels indicate endogenous sequences, whereas taxa labels in italics indicate sequences known or believed to derive from viruses.



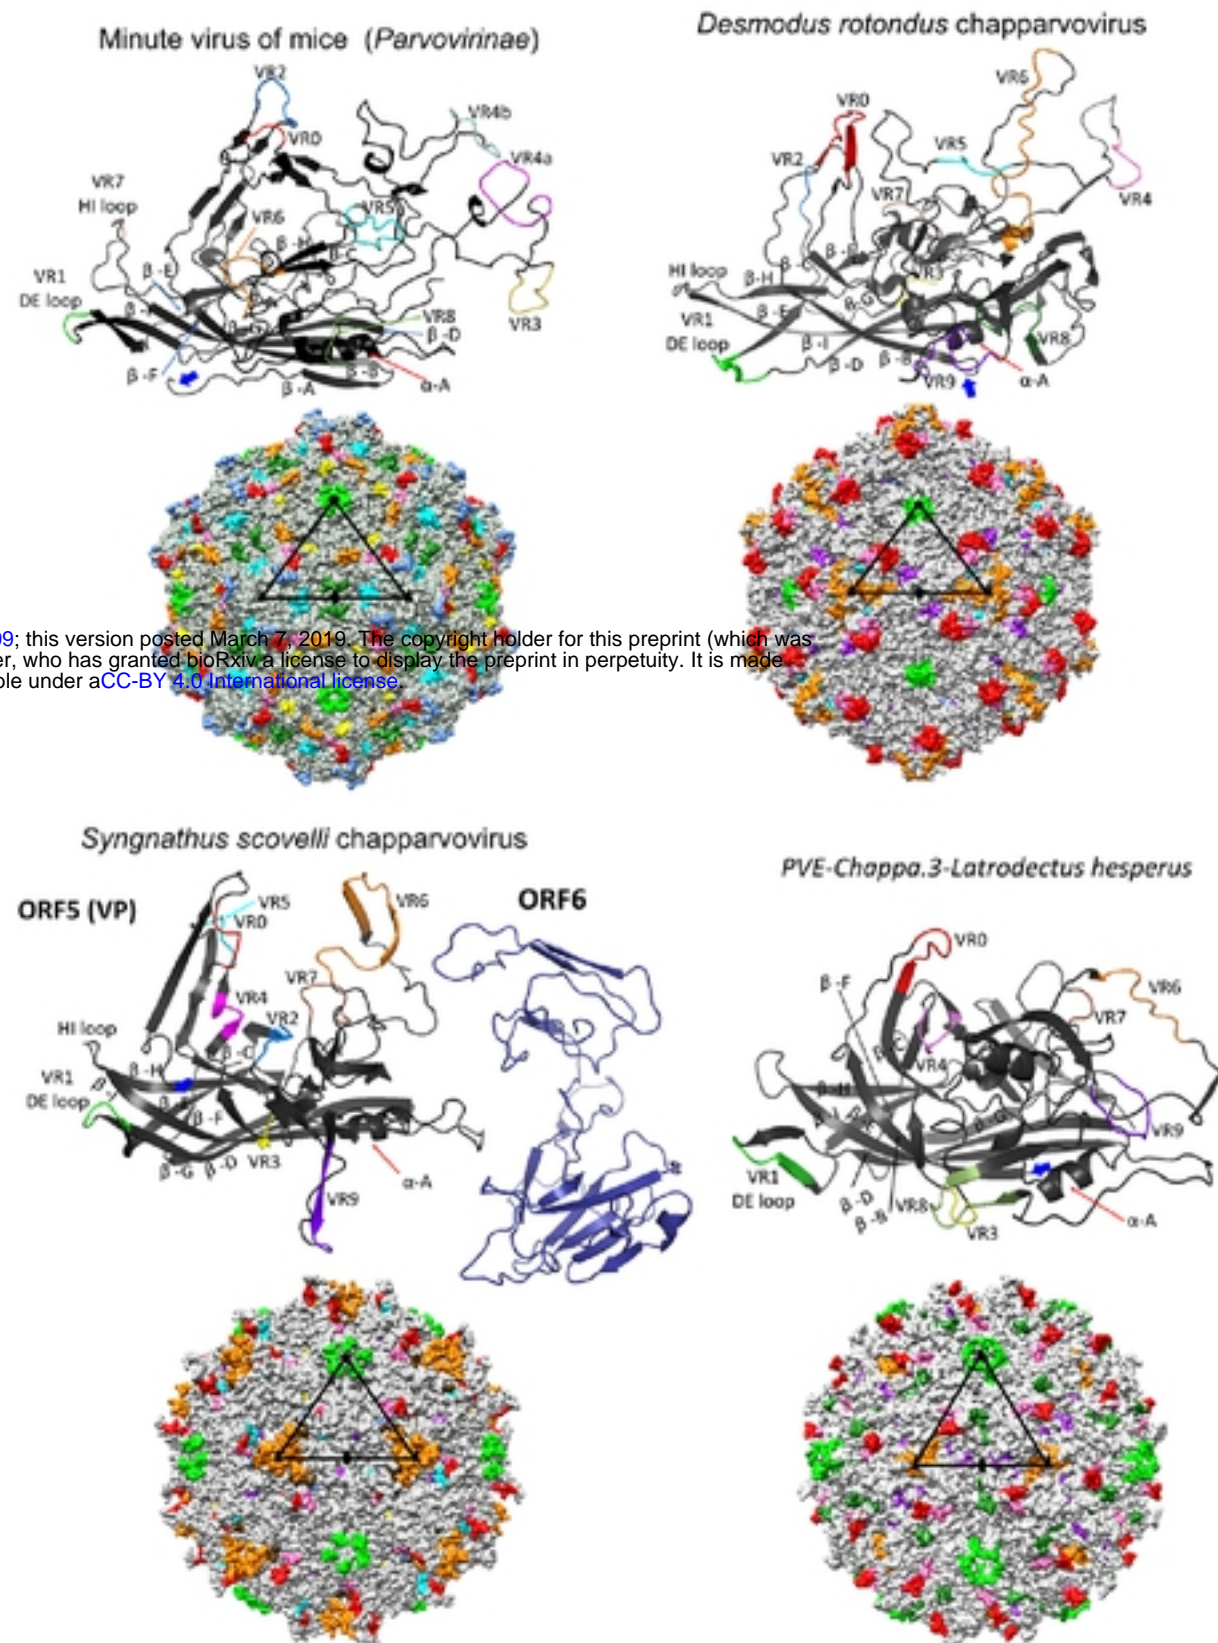

## Figure 4

Comparison of VP monomer ribbon diagrams of the protoparvovirus minute virus of mice (PDB ID: 1Z14) from subfamily *Parvovirinae* to homology models of an amniote, a fish and an endogenous arthropod chapparovirus. Variable regions (VRs) of the same number are marked by the same color and mapped to the surface area of the icosahedral capsid model constructed of 60 monomers. In case of the novel *Syngnathus scovelli* chapparovirus the hypothetical structural protein product of ORF6 was also modelled. Triangles mark the position of a single monomer within the capsid, the fivefold



symmetry axis marked by a pentagon, the threefolds with triangles and the twofold with an ellipsoid.

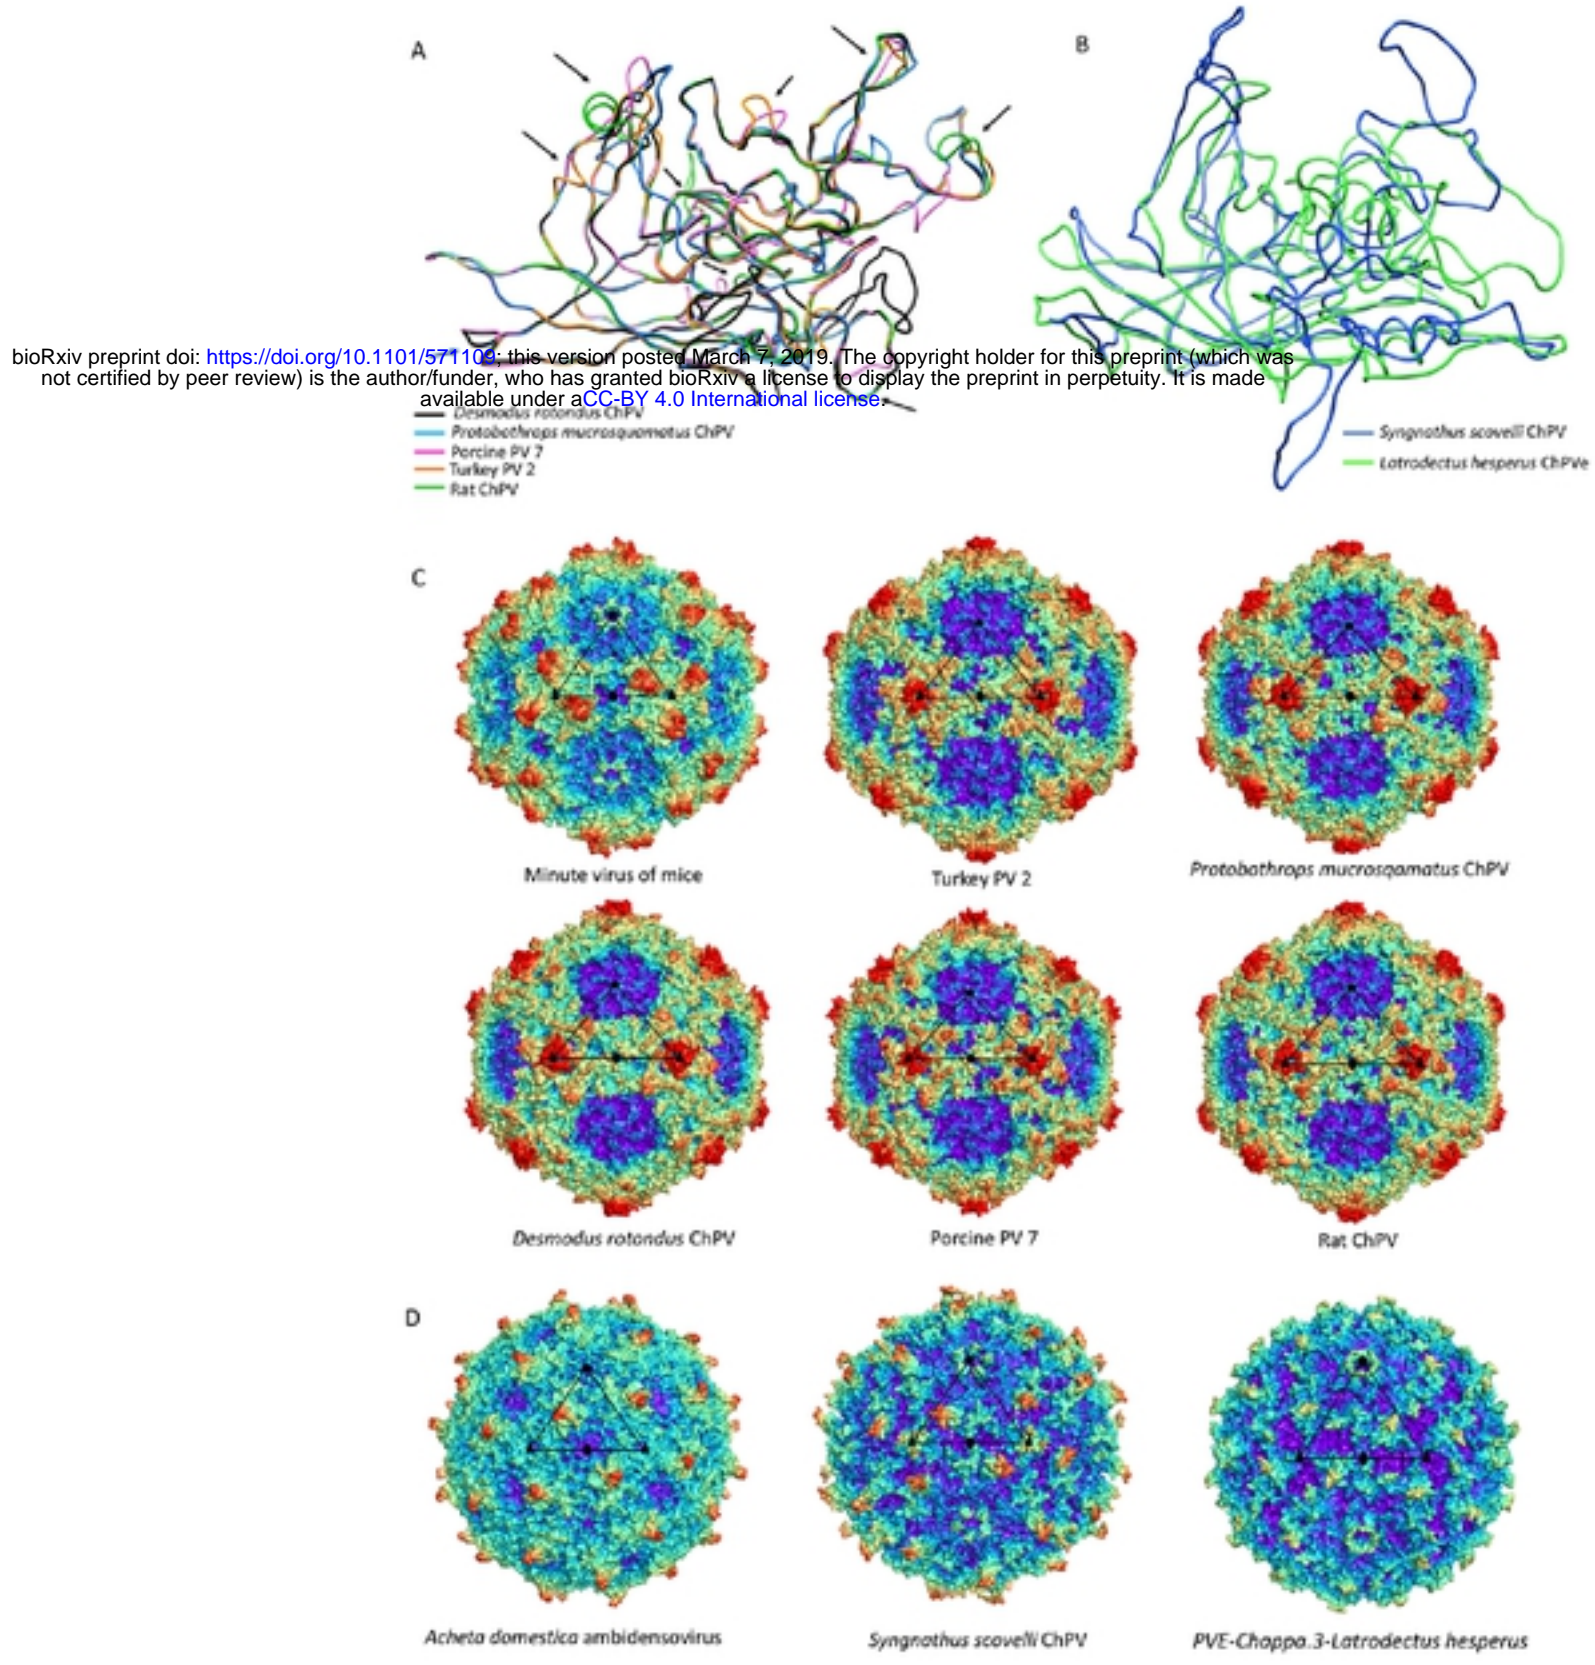

## Figure 5

(A) Superposition of protein monomer homology models of amniote chapparovirus capsids, including reptilian, avian, rodent, chiropteran and ungulate representatives. Black arrows show variable regions (VRs) (B) Superposition of capsid protein monomer homology model of the novel exogenous fish chapparovirus of *Syngnathus scovelli* with that of an endogenous arthropod chapparovirus element. (C) Capsid surface morphology of amniote chapparovirus homology models compared to that obtained for a prototypic parvovirus, minute virus of mice (MVM) (PDB ID: 1Z14 at 3.25 Å resolution). Triangles mark the position of a single monomer within the capsid, the fivefold symmetry axis marked by a pentagon, the threefolds with triangles and the twofold with an ellipsoid. (D) Homology models of complete viral capsids to compare surface morphology of the newly-identified fish chapparovirus and arachnid endogenous chapparoviral element with that of the actual capsid structure of a densovirus of subfamily Densovirinae, genus Ambidensovirus (PDB ID: 4MGU at 3.5 Å resolution).
